# Supplementary material for: High secondary formation of nitrogen-containing organics (NOCs) and its possible link to oxidized organics and ammonium
Source: Copernicus journal article supplement (doi:10.5194/acp-2019-636), 2019-07-30
Supplement: Supplementary file [file acp-2019-636-AC1-supplement.pdf]

---

## Response to comments

Review of “High secondary formation of nitrogen-containing organics (NOCs) and its possible link to oxidized organics and ammonium” by G. Zhang et al.

### General Comments:

This study presents the results of single-particle measurements in Guangzhou, China. The focus is on nitrogen-containing organic compounds (NOC) and the role of ammonium in NOC formation. The highly time resolved measurements span four seasons, and thus could offer new insight into NOC chemistry. While the data set is unique and the topic is certainly appropriate for Atmospheric Chemistry and Physics, there are quite a few major issues with the study – including analysis methods, assumptions, data interpretations, and conclusions – that prevent me from recommending it for publication at this time. It is possible that these issues could be addressed with a major revision, but not guaranteed. My specific concerns are addressed below.

We would like to thank the reviewer for his/her useful comments and recommendations to improve the manuscript. We have addressed the specific comments in the sections below and made the appropriate revisions to the manuscript. Reviewer comments are in black text followed by our response in blue text.

### Specific Comments:

1. The authors come to the conclusion that NOC formation during their study is not likely from gas-phase reactions, but is predominantly from heterogeneous/particle-phase reactions. Their logic for this argument is quite confusing. I do not believe this conclusion is at all supported by the data presented in the manuscript.

Thanks for the constructive comment. The reviewer thought our hypothesis that NOCs

---

formation from oxidized organics and ammonium was confusing, which is largely because the supporting evidence was not separately discussed and emphasized. In the revised manuscript, therefore, we reorganized the text and emphasized the evidence to make the argument more clear. Based on both the enhancement of NOCs and the high correlations with oxidized organics and ammonium, a hypothesis is put forward: interactions between oxidized organics and ammonium contribute to the observed NOCs. To support such hypothesis, further evidence such as diurnal variations of NOCs, filter measurements and multiple linear regression analysis are provided and discussed. Supporting evidence from previous laboratory and modeling studies is also discussed. Please refer to section 3.1 for more details.

2. Similarly, I think the explanations for the role of NO<sub>x</sub> and NH<sub>3</sub> in particle NOC formation are extremely muddled. For NH<sub>3</sub>, a positive correlation is observed between the number fraction of particles with NH<sub>4</sub><sup>+</sup> and NOC, while a negative correlation is observed between the relative peak areas of these compound classes. There is not a reasonable explanation given for this surprising and apparently contradictory behavior. Further, the manuscript mostly discounts the negative correlation in the relative peak areas, instead assuming that NH<sub>3</sub> drives (or is prominently involved in) NOC formation. NO<sub>x</sub> is completely ruled out as a contributor to NOC formation on the basis of poor (or no) correlations between NOC and NO<sub>x</sub>. However, this is a misinterpretation of the data. Many factors (different removal processes and lifetimes of particles vs. gasses, primary vs. secondary species, etc.) could contribute to a lack of correlation even if NO<sub>x</sub> did contribute to NOC formation. As the data are currently presented and explained, it is completely unclear how NH<sub>3</sub> or NO<sub>x</sub> play a role in NOC formation in the present study, although such analyses should be possible with their data set.

Thanks for the comment. We also think that it is a surprising and interesting results for the contradictory correlation between NOCs and ammonium. We have highlighted it as “Interestingly, the relationship between NOCs and ammonium was distinctly different from the relationship between NOCs and oxidized organics.” and “A positive

---

correlation ( $R^2 = 0.50$ ,  $p < 0.01$ ) is observed between the hourly detected number of NOCs and ammonium. It is worth noting that a negative correlation ( $R^2 = 0.55$ ,  $p < 0.01$ ) is obtained between the hourly average RPAs of NOCs and ammonium (Fig. 3).” in Lines 176-179 and 201-202.

To make the statement clearer, we highlighted the reasoning in two parts in the revised manuscript as “Interestingly, the relationship between NOCs and ammonium is distinctly different from the relationship between NOCs and oxidized organics (Fig. 3). This implies that the controlling factors on the formation of NOCs from ammonium are different from oxidized organics. On one hand, the positive correlation between the detected numbers reflects that the formation of NOCs does require the participant of  $\text{NH}_3/\text{NH}_4^+$ , consistent with the enhancement of NOCs in ammonium-containing particles discussed above. On the other hand, the negative correlation between the RPAs signifies that particles with higher relative ammonium content may inhibit the formation of NOCs.”. Please refer to Lines 209–216.

For the role of NOx on the formation of NOCs, we agree with the comment that many factors (different removal processes and lifetimes of particles vs. gasses, primary vs. secondary species, etc.) could contribute to a lack of correlation even if NOx did contribute to NOC formation. In the Lines 319-328 of the revised manuscript, we have added this probability in our discussion, as “Low correlation coefficients ( $R^2 = 0.02$ – $0.13$ ) between NOCs and NOx likely indicates limited contribution of this pathways to the observed NOCs. We have also included an analysis on the relationship between peak ratios of NOCs/oxidized organics and NOx. Peak area ratios of NOCs/oxidized organics generally increases with increasing level of NOx (Fig. 6), but still with relatively weak correlation ( $R^2 = 0.18$ ,  $p < 0.01$ ). An inclusion of both NOx and RH in the above linear regression model (NOCs versus the oxidized organics and ammonium) does not improve the prediction of NOCs ( $R^2 = 0.71$ ,  $p < 0.01$ ). However, it is also noted that many factors (e.g., different removal processes and lifetimes of particles vs. gasses, primary vs. secondary species, etc.) could

---

contribute to a lack of strong correlation even if NO<sub>x</sub> did contribute to NOC formation.”.

3. The assumptions and discussion related to particle acidity (lines 307 – 337, Figure 7) are not correct. Recent studies have shown that ratios of aerosol inorganics (including variations involving NH<sub>4</sub>-SO<sub>4</sub>-NO<sub>3</sub>) are not suitable proxies for particle acidity (Guo et al., 2015; Hennigan et al., 2015; Murphy et al., 2017). Also, the discussion of acid-catalyzed SOA (lines 375-381) is not correct, so the implications of the present study are misstated.

Thanks for pointing out the deficiency. We agree with the comment that ratios of aerosol inorganics are not suitable proxies for particle acidity. Therefore, we have shorten our discussion on this issue, and included these references to show that the estimated particle acidity may not be representative of actual aerosol acidity or pH. In the revised manuscript, we only intend to show that the variation of ammonium may affect the particle acidity in the following sentence: “...particles with higher relative ammonium content may inhibit the formation of NOCs. This is supported by the inverse correlation between that Nfs of ammonium that internally mixed with NOCs and the RPAs of ammonium (Fig. S7). This is also theoretically possible since the formation of NOCs may be influenced by particle acidity (Miyazaki et al., 2014; Aiona et al., 2017; Nguyen et al., 2012), which is substantially affected by the abundance of ammonium. Particle acidity could also play a significant role in the gas-to-particle partitioning of aldehydes (Herrmann et al., 2015; Liggio et al., 2005; Gen et al., 2018; De Haan et al., 2018; Kroll et al., 2005), precursors for the formation of oxidized organics. Consistently, higher relative acidity was observed for the internally mixed ammonium and NOCs particles, compared to ammonium-containing particles without NOCs (Fig. S6), and thus may influence the formation of NOCs (Fig. S7). However, the higher relative acidity might also be a result of NOCs formation. A model simulation shows that after including the chemistry of SOA ageing with NH<sub>3</sub>, an increase in aerosol acidity would be expected due to the reduction in ammonium

---

(Zhu et al., 2018). It is also noted that the particle acidity is roughly estimated by the relative abundance of ammonium, nitrate, and sulfate in individual particles (Denkenberger et al., 2007), and thus may not be representative of actual aerosol acidity or pH (Guo et al., 2015; Hennigan et al., 2015; Murphy et al., 2017).”, please refer to Line 217-233.

4. Finally, the application, interpretation, and discussion of PMF and multiple linear regression methods need substantial revision. The explanation of the PMF approach is quite confusing, and as it is written, does not add anything substantive beyond the general correlations presented before it. The multiple linear regression also does not support any of the stated conclusions, beyond what was already presented for the individual correlations to  $\text{NH}_4^+$  and oxygenated organics. The discussion of “modelled NOCs” (e.g., lines 291, 374, Fig. 4) is misleading, especially compared to how this is typically used in atmospheric studies.

Thanks for the comment. We think the reviewer’s confusion about the explanation of PMF and linear regression analysis is largely because the additional information provided by PMF and linear regression analysis was not emphasized in the original manuscript. In the revised manuscript (section 3.2), we have highlighted the additional information provided by the PMF approach in a new section 3.2: Three PMF factors were resolved to explain the formation of NOCs. Around 75% of NOCs could be well explained by two factors, with 33% of the PMF resolved NOCs mainly associated with ammonium and carbonaceous ion peaks (ammonium factor), while 59% were mainly associated with oxidized organics (oxidized organics factor). The explained fraction of NOCs by the ammonium and oxidized organic factors is consistent with the linear regression analysis. In addition, PMF analysis provided information on the factor contribution and diurnal variations, which may help explain the seasonal variations and processes of NOCs. Profiles and their diurnal variations of these factors (Fig. 5) suggest that there were two competitive pathways for the evolution of these oxidized organics. Some oxidized organics formed from photochemical

---

activities were further oxidized to oxalate, resulting in a diurnal pattern of variation with concentration peaks during the afternoon (Fig. 5), while others interact with  $\text{NH}_3/\text{NH}_4^+$  to form NOCs, peaking during the nighttime.

The multiple linear regression applied herein is to show how well the observed NOCs could be reconstructed by the observed oxidized organics and ammonium. As expected, there is a close association ( $R^2 = 0.71$ ,  $p < 0.01$ ) between the predicted RPAs and the observed values of NOCs (Fig. 4), which supports this hypothesis. An obvious improvement in  $R^2$  implies that a model that uses both oxidized organics and ammonium to predict RPAs of NOCs is substantially better than one that uses only one predictor (either oxidized organics or ammonium in Fig. 3). We understand that the use of “modelled NOCs” for the regression analysis may be misleading. In the revised manuscript, we revised the “modelled NOCs” to “PMF resolved NOCs” to avoid the misunderstanding.

#### **Technical Corrections:**

The above issues are substantial enough that any technical corrections can be addressed on review of the revised manuscript.

Thanks for the comment. We have carefully examined possible technical errors, including those raised by Refree 2#.

#### **References:**

- Guo, H., Xu, L., Bougiatioti, A., Cerully, K. M., Capps, S. L., Hite Jr., J. R., Carlton, A. G., Lee, S.-H., Bergin, M. H., Ng, N. L., Nenes, A., and Weber, R. J.: Fine-particle water and pH in the southeastern United States, *Atmos. Chem. Phys.*, 15, 5211-5228, <https://doi.org/10.5194/acp-15-5211-2015>, 2015.
- Hennigan, C. J., Izumi, J., Sullivan, A. P., Weber, R. J., and Nenes, A.: A critical evaluation of proxy methods used to estimate the acidity of atmospheric particles,

---

Atmos. Chem. Phys., 15, 2775–2790, <https://doi.org/10.5194/acp-15-2775-2015>, 2015.

Murphy, J. G., Gregoire, P. K., Tevlin, A. G., Wentworth, G. R., Ellis, R. A., Markovic, M. Z., and VandenBoer, T. C.: Observational constraints on particle acidity using measurements and modelling of particles and gases, *Faraday Discuss.*, 200, 379-395, <https://doi.org/10.1039/c7fd00086c>, 2017.

---

**High secondary formation of nitrogen-containing organics (NOCs) and its possible link to oxidized organics and ammonium**

Guohua Zhang<sup>1</sup>, Xiufeng Lian<sup>1,2</sup>, Yuzhen Fu<sup>1,2</sup>, Qinhao Lin<sup>1</sup>, Lei Li<sup>3</sup>, Wei Song<sup>1</sup>, Zhanyong Wang<sup>4</sup>, Mingjin Tang<sup>1</sup>, Duohong Chen<sup>5</sup>, Xinhui Bi<sup>1,\*</sup>, Xinming Wang<sup>1</sup>, Guoying Sheng<sup>1</sup>

<sup>1</sup> State Key Laboratory of Organic Geochemistry and Guangdong Key Laboratory of Environmental Resources Utilization and Protection, Guangzhou Institute of Geochemistry, Chinese Academy of Sciences, Guangzhou 510640, PR China

<sup>2</sup> University of Chinese Academy of Sciences, Beijing 100039, PR China

<sup>3</sup> Institute of Mass Spectrometer and Atmospheric Environment, Jinan University, Guangzhou 510632, PR China

<sup>4</sup> School of Intelligent Systems Engineering, Sun Yat-sen University, Shenzhen 518107, PR China

<sup>5</sup> State Environmental Protection Key Laboratory of Regional Air Quality Monitoring, Guangdong Environmental Monitoring Center, Guangzhou 510308, PR China

Correspondence to: Xinhui Bi (bixh@gig.ac.cn)



---

19 **Highlights**

- 20 ● Nitrogen-containing organics (NOCs) were highly internally mixed with photochemically  
21 produced secondary oxidized organics
- 22 ● ~~More than 50% of~~ NOCs ~~were could be~~ well predicted by ~~secondary formation from the~~  
23 ~~variations of~~ these— oxidized organics and ammonium
- 24 ● Higher relative humidity and ~~particle acidity~~ NO<sub>x</sub> may facilitated the ~~formation conversion~~  
25 of these oxidized organics to NOCs

---

## Abstract

Nitrogen-containing organic compounds (NOCs) substantially contribute to light absorbing organic aerosols, although the atmospheric processes responsible for the secondary formation of these compounds are poorly understood. In this study, seasonal atmospheric processing of NOCs were investigated by single particle mass spectrometry in urban Guangzhou from 2013-2014. The relative abundance of NOCs is found to be strongly enhanced ~~by when~~ internal mixing with the photochemically produced secondary oxidized organics (such as i.e., -formate, acetate, pyruvate, methylglyoxal, glyoxylate, oxalate, malonate and succinate) ~~and, Furthermore, the co-occurrence of NOCs with ammonium was also observed.~~ In addition, both the hourly detected particle number and relative abundance of NOCs are highly correlated with those of secondary oxidized organics and ammonium. It is therefore hypothesized that secondary formation of NOCs most likely links to the oxidized organics and ammonium. Results from both multiple linear regression analysis and positive matrix factorization analysis further show that the relative abundance of NOCs could be well predicted ( $R^2 > 0.7$ ,  $p < 0.01$ ) by the oxidized organics and ammonium. Interestingly, the relative abundance of NOCs is inversely correlated with ammonium, ~~while whereas~~ their number fractions are positively correlated. This result suggests ~~ss~~ that although the formation of NOCs does require the involvement of  $\text{NH}_3/\text{NH}_4^+$ , the relative amount of ammonium may have a negative effect~~does involvement  $\text{NH}_3/\text{NH}_4^+$ . Multiple linear regression analysis and positive matrix factorization analysis were performed to predict the relative abundance of NOCs generated from oxidized organics and ammonium.~~ The conversion of oxidized organics to

---

47 ~~NOCs is likely facilitated by higher~~ Both results showed close associations ( $R^2 > 0.7$ ,  $p < 0.01$ )  
48 ~~between the predicted NOCs and the observed values. Increased humidity and higher particle~~  
49 ~~acidity~~ ~~NOx may promote the production of NOCs.~~ Due to the relatively high contribution of  
50 oxidized organics and  $\text{NH}_3/\text{NH}_4^+$ , the relative contributions of NOCs in summer and autumn  
51 ~~is/were~~ higher than ~~that/those~~ in spring and winter. To the best of our knowledge, this is the first  
52 direct field observation study reporting a close association between NOCs and both oxidized  
53 organics and ammonium. These findings have substantial implications for the role of  
54 ammonium in the atmosphere, particularly in models that predict the evolution and deposition  
55 of NOCs.

56

57 **Keywords:** nitrogen-containing organic compounds, individual particles, oxidized organics,  
58 ammonium, mixing state, single particle mass spectrometry

## 1 Introduction

Organic aerosols that strongly absorb solar radiation are referred to as brown carbon (BrC), capable of a comparable level of light absorption in the spectral range of near-ultraviolet (UV) light as black carbon (Andreae and Gelencser, 2006; Feng et al., 2013; Yan et al., 2018). Nitrogen-containing organic compounds (NOCs) ~~substantially represent a large and complicate fraction of atmospheric aerosols (Nehir, 2018 #21993; Zhang, 2012 #9722; Cape, 2012 #22004), significantly contributing~~ to the pool of BrC (Feng et al., 2013; Mohr et al., 2013; Li et al., 2019). ~~and, Furthermore, NOCs~~ have a major effect on atmospheric chemistry, human health and climate forcing (Noziere et al., 2015; Kanakidou et al., 2005; Shrivastava et al., 2017; De Gouw and Jimenez, 2009). The particulate organic nitrogen ~~component of NOCs~~ accounts for a large fraction of total airborne nitrogen (~30%), although the proportion exhibits a high variability temporally and spatially, and therefore has an influence on both regional and global N deposition (Neff et al., 2002; Shi et al., 2010; Cape et al., 2011). However, the sources, evolution and optical properties of NOCs remain unclear and contribute significantly to uncertainties in the estimation of their impacts on the environment and climate (Laskin et al., 2015; Feng et al., 2013).

NOCs are ubiquitous components of atmospheric aerosols, cloud water and rainwater (Altieri et al., 2009; Desyaterik et al., 2013; Laskin et al., 2015), spanning a wide range of molecular weights, structures and light absorption properties (Lin et al., 2016). Emissions of primary NOCs have been attributed to biomass burning, coal combustion, vehicle emissions,

---

80 biogenic production and soil dust (Laskin et al., 2009; Desyaterik et al., 2013; Sun et al.,  
81 2017; Mace et al., 2003; Rastogi et al., 2011; Wang et al., 2017). A ~~G~~rowing body of  
82 evidence from laboratory studies suggests s that secondary NOCs may be produced in gas  
83 phase, aerosol, and clouds. Maillard reactions involving mixtures of atmospheric aldehydes  
84 (e.g., methylglyoxal/glyoxal) and ammonium/amines are of particular interests (e.g.,  
85 Hawkins et al., 2016; De Haan et al., 2017; De Haan et al., 2011). ~~Similarly, a~~ A significant  
86 portion of NOCs may also be derived from the heterogeneous ageing of secondary organic  
87 aerosol (SOA) with  $\text{NH}_3$  /  $\text{NH}_4^+$  (Liu et al., 2015; Laskin et al., 2015). Mang et al. (2008)  
88 proposed that even trace levels of ammonia may be sufficient to form NOCs via this pathway.  
89 In addition, gas phase formation of NOCs through interaction between volatile organic  
90 hydrocarbons and  $\text{NO}_x$  and other oxidations, followed by condensation may ~~also~~ have  
91 potential contribution (Fry et al., 2014; Stefenelli et al., 2019; Lehtipalo et al., 2018).

92 The secondary formation of NOCs is especially prevalent in environments experiencing  
93 high anthropogenic emissions (Yu et al., 2017; Ho et al., 2015), although further studies are  
94 required to comprehensively establish the formation mechanisms. A major obstacle is that  
95 organic and inorganic matrix effects have a profound impact on the chemistry of organic  
96 compounds in bulk aqueous particles and particles undergoing drying (El-Sayed et al., 2015;  
97 Lee et al., 2013). While real-time characterization studies remain a challenge due to the  
98 extremely complex chemical nature of NOCs, establishing this data along with the co-  
99 variation of NOCs with other chemical components would help to identify the sources and  
100 evolution of NOCs. Using single-particle aerosol time-of-flight mass spectrometry, Wang et

---

al. (2010) observed that the widespread occurrence of NOCs was closely correlated with particle acidity in the atmosphere of Shanghai (China). In addition, real-time measurements of the atmosphere in New York (US) by aerosol mass spectrometry indicated a positive link between the age of organic species and the N/C ratio (Sun et al., 2011). Further in-depth studies are required to identify the role of formation conditions (e.g., relative humidity (RH) and pH) for secondary NOCs (Aiona et al., 2017; Nguyen et al., 2012). In present study, the mixing state of individual particles were investigated, involving NOCs, oxidized organics and ammonium, based on on-line seasonal observations using a single particle aerosol mass spectrometry (SPAMS). Our findings show that the formation of NOCs is significantly linked to oxidized organics and  $\text{NH}_4^+$ , which has important environmental implications for assessing the impact and fate of these compounds.

## 2 Methods

### 2.1 Field measurements

Sampling was performed at the Guangzhou Institute of Geochemistry, a representative urban site in Guangzhou (China), a megacity in the Pearl River Delta (PRD) region. SPAMS analysis was performed (Hexin Analytical Instrument Co., Ltd., China) to establish the size and chemical composition of individual particles in real-time (Li et al., 2011). The sampling inlet for aerosol characterization was situated 40 meters above the ground level. A brief description of the performance of SPAMS and other instruments can be found in the Supporting Information. The sampling periods covered four seasons including spring (21/02

---

to 11/04 2014), summer (13/06 to 16/07 2013), autumn (26/09 to 19/10 2013) and winter (15/12 to 25/12 2013). The total measured particle numbers and mean values for meteorological data and gaseous pollutants, are outlined for each season in Table S1 and were described in a previous publication (Zhang et al., 2019).

## 2.2 SPAMS data analysis

Fragments of NOCs were identified according to detection of ion peaks at  $m/z$  -26  $[\text{CN}]^-$  or -42  $[\text{CNO}]^-$ , generally due to the presence of C-N bonds (Silva and Prather, 2000; Zawadowicz et al., 2017; Pagels et al., 2013). Laboratory produced C-N bonds compounds from bulk solution-phase reactions between the representative oxidized organics (i.e., methylglyoxal) and ammonium sulfate was used to confirm the generation of ion peaks at  $m/z$  -26  $[\text{CN}]^-$  and/or -42  $[\text{CNO}]^-$  using SPAMS (Fig. S1). Thus, the NOCs herein may refer to complex nitrated organics such as organic nitrates, nitro-aromatics, nitrogen heterocycles and polyphenols. Unfortunately, how well  $[\text{CN}]^-/[\text{CNO}]^-$  ions could represent NOCs cannot be quantified, although they were the most commonly reported NOCs peaks by single particle mass spectrometry (Silva and Prather, 2000; Zawadowicz et al., 2017; Pagels et al., 2013). In the present study,  $[\text{CN}]^-/[\text{CNO}]^-$  ions are among the major peaks detected by the SPAMS (Fig. 1). A rough estimate from the peak area ratio of  $[\text{CN}]^-/[\text{CNO}]^-$  ions and the most likely NOCs fragments (i.e., various amines, and an entire series of nitrogen-containing cluster ions  $\text{C}_n\text{N}^+$ ,  $n = 1, 2, 3, \dots$ ) (Silva and Prather, 2000) shows that  $[\text{CN}]^-/[\text{CNO}]^-$  ions may represent more than 90% of these NOCs peaks. The number fractions (Nfs) of particles

that contained NOCs ranged from 56-59% across all four seasons (Table S1). The number of detected NOCs-containing particles distributing along their vacuum aerodynamic diameter ( $d_{va}$ ) is shown in Fig. S2. Most of the detected NOC-containing particles had a  $d_{va}$  in a range of 300-1200 nm.

A representative mass spectrum for NOCs-containing particles is shown in Fig. 1. Dominant peaks in the mass spectrum were 39 [K]<sup>+</sup>, 23 [Na]<sup>+</sup>, nitrate (-62 [NO<sub>3</sub>]<sup>-</sup> or -46 [NO<sub>2</sub>]<sup>-</sup>), sulfate (-97 [HSO<sub>4</sub>]<sup>-</sup>), organics (27 [C<sub>2</sub>H<sub>3</sub>]<sup>+</sup>, 63 [C<sub>5</sub>H<sub>3</sub>]<sup>+</sup>, -42 [CNO]<sup>-</sup>, -26 [CN]<sup>-</sup>), ammonium (18 [NH<sub>4</sub>]<sup>+</sup>) and carbon ion clusters (C<sub>n</sub><sup>+/-</sup>, n = 1, 2, 3,...). NOCs-containing particles were internally mixed with various oxidized organics, represented as formate at m/z -45 [HCO<sub>2</sub>]<sup>-</sup>, acetate at m/z -59 [CH<sub>3</sub>CO<sub>2</sub>]<sup>-</sup>, methylglyoxal at m/z -71 [C<sub>3</sub>H<sub>3</sub>O<sub>2</sub>]<sup>-</sup>, glyoxylate at m/z -73 [C<sub>2</sub>HO<sub>3</sub>]<sup>-</sup>, pyruvate at m/z -87 [C<sub>3</sub>H<sub>3</sub>O<sub>3</sub>]<sup>-</sup>, malonate at m/z -103 [C<sub>3</sub>H<sub>3</sub>O<sub>4</sub>]<sup>-</sup> and succinate at m/z -117 [C<sub>4</sub>H<sub>3</sub>O<sub>4</sub>]<sup>-</sup> (Zhang et al., 2017; Zauscher et al., 2013; Lee et al., 2003).

These oxidized organics showed their pronounced diurnal trends with afternoon maximum, and were highly correlated ( $r = 0.72 - 0.94$ ,  $p < 0.01$ ) with each other. Therefore, they were primarily attributed to~~The contribution of these ion peaks to the formation of~~ secondary oxidized organics from photochemical oxidation products of various volatile organic compounds (VOCs) (Paulot et al., 2011; Zhao et al., 2012; Ho et al., 2011), and the details can be found in our previous publication~~has been previously confirmed based on their pronounced diurnal trends, with maximum concentrations observed in the afternoon~~ (Zhang et al., 2019). Furthermore, these oxidized organics have been reported to be highly correlated ( $r = 0.72 - 0.94$ ,  $p < 0.01$ ) with each other (Zhang et al., 2019), consistent with the assumption

域代码已更改



that they are photochemical oxidation products of various volatile organic compounds (VOCs) (Paulot et al., 2011; Zhao et al., 2012; Ho et al., 2011). More information on the seasonal variation range of the Nfs of oxidized organics, ammonium and NOCs is presented in Fig. S3.

Hourly mean Nfs and relative peak areas were applied herein to indicate the variations of aerosol compositions in individual particles. Even though advances have been made in the quantification of specific chemical species for individual particles based on their respective peak area information, it is still quite a challenge for SPAMS to provide quantitative information on aerosol components mainly due to matrix effects, incomplete ionization and so forth (Qin et al., 2006; Jeong et al., 2011; Healy et al., 2013; Zhou et al., 2016). Despite of this, the variation of relative peak area should be a good indicator for the investigation of atmospheric processing of various species in individual particles (Wang et al., 2010; Zauscher et al., 2013; Sullivan and Prather, 2007; Zhang et al., 2014).

### 3 Results and Discussion

#### 3.1 Evidence for the formation of NOCs from oxidized organics and ammonium

Figure 2 shows the seasonal variations in Nfs of the oxidized organics and ammonium, which were internally mixed with NOCs. On average, more than 90% of the oxidized organics and 65% of ammonium (except spring) were found to be internally mixed with NOCs (Fig. S4). Regarding that Based on the comparison of the Nfs of NOCs (~60%) relative to all the measured particles was ~60%, it could be concluded that NOCs were

enhanced with the presence of oxidized organics and ammonium, with the enhancement associated with oxidized organics being the most pronounced.

A strong correlation between both the Nfs and relative peak areas (RPAs) of NOCs and oxidized organics further demonstrates ~~a their~~ close associations ~~between these factors~~, as shown in Fig. 3. Compared with the ~~variation in~~ oxidized organics, the Nfs of ammonium-containing particles internally mixed with NOCs varied within a wider range (~40-90%).

However, there ~~was is~~ still an enhancement mixing of NOCs with ammonium. ~~In addition,~~ ~~a~~ A positive correlation ( $R^2 = 0.50$ ,  $p < 0.01$ ) is observed between the hourly detected number of NOCs and ammonium. In contrast, It is worth noting that a negative correlation ( $R^2 = 0.55$ ,  $p < 0.01$ ) is obtained between the hourly average RPAs of NOCs and ammonium (Fig. 3). ~~Interestingly, the relationship between NOCs and ammonium was distinctly different from the relationship between NOCs and oxidized organics. A positive correlation ( $R^2 = 0.50$ ,  $p < 0.01$ ) was observed between the hourly detected number of NOCs and ammonium. In contrast, a negative correlation ( $R^2 = 0.55$ ,  $p < 0.01$ ) was observed between the hourly average relative peak areas (RPAs) of NOCs and ammonium (Fig. 3).~~

Based on both the enhancement of NOCs and the high correlations with oxidized organics and ammonium, ~~it is hypothesized that~~ interactions between oxidized organics and ammonium ~~contributed to the observed NOCs~~ ~~the dominant association between oxidized organics and NOCs (Fig. 2) indicates that NOCs may be formed from the processing of secondary oxidized organics in particle phase, rather than gas phase reactions followed by condensation.~~ Actually, formation of NOCs from ammonium and carbonyls has been

confirmed in several laboratory studies (Sareen et al., 2010; Shapiro et al., 2009; Noziere et al., 2009; Kampf et al., 2016; Galloway et al., 2009). Secondary organic aerosols (SOA) produced from a large group of biogenic and anthropogenic VOCs can be further aged by  $\text{NH}_3/\text{NH}_4^+$  to generate NOCs (Nguyen et al., 2012; Bones et al., 2010; Updyke et al., 2012; Liu et al., 2015; Huang et al., 2017). In a chamber study, the formation of NOCs ~~were found to be~~ enhanced in a  $\text{NH}_3$ -rich environment (Chu et al., 2016). While such chemical mechanisms might be complex, the initial steps generally involve reactions forming imines and amines, which can further react with carbonyl SOA compounds to form more complex products (e.g., oligomers/BrC) (Laskin et al., 2015).

域代码已更改

域代码已更改

域代码已更改

To verify this hypothesis, multiple linear regression analysis ~~was~~is performed to test how well ~~could~~ the RPAs of NOCs could be predicted by the oxidized organics and ammonium. As expected, there is a close association ( $R^2 = 0.71$ ,  $p < 0.01$ ) between the predicted RPAs and the observed values of NOCs (Fig. 4), which supports this hypothesis. An ~~obvious~~ ~~substantial~~ improvement in  $R^2$  implies that a model that uses both oxidized organics and ammonium to predict RPAs of NOCs is substantially better than one that uses only one predictor (either oxidized organics or ammonium in Fig. 3). The result indicates that interactions involving oxidized organics and ammonium could explain over half of the observed variations in NOCs in the atmosphere of Guangzhou. A fraction of the unaccounted NOCs could be due to primary emissions and other formation pathways.

~~Actually, formation of NOCs from ammonium and carbonyls have been confirmed in several laboratory studies (Sareen et al., 2010; Shapiro et al., 2009; Noziere et al., 2009;~~

域代码已更改

Kampf et al., 2016; Galloway et al., 2009). Secondary organic aerosols (SOA) produced from a large group of biogenic and anthropogenic VOCs can be further aged by  $\text{NH}_3/\text{NH}_4^+$  to generate NOCs (Nguyen et al., 2012; Bones et al., 2010; Updyke et al., 2012; Liu et al., 2015; Huang et al., 2017). In a chamber study, the formation of NOCs were found to be enhanced in a  $\text{NH}_3$ -rich environment (Chu et al., 2016). While such chemical mechanisms might be complex, the initial steps generally involve reactions forming imines and amines, which can further react with carbonyl SOA compounds to form more complex products (e.g., oligomers/BrC) (Laskin et al., 2015).

域代码已更改

域代码已更改

This hypothesis could also be supported by the similar pattern of diurnal variation observed for NOCs and oxidized organics (Fig. S5), although there is a slight lag period was observed infor the ~~the overnight peaks of NOCs~~. Such diurnal pattern is similar to those observed in Beijing and Uintah (Yuan et al., 2016; Zhang et al., 2015). Notably, such diurnal pattern of secondary NOCs is effectively modelled when the production of NOCs via carbonyls and ammonium is included (Woo et al., 2013). In addition to possible photo-bleaching (Zhao et al., 2015), the lower contribution of NOCs during daytime may be partly explained by the lower RH, as discussed in section 3.2.

Interestingly, the relationship between NOCs and ammonium is distinctly different from the relationship between NOCs and oxidized organics (Fig. 3). Water soluble organic nitrogen (WSON) was reported to be positively correlated with some oxidation products in

a forest in northern Japan (Miyazaki et al., 2014). This is further supported by the similar pattern of diurnal variation observed for NOCs and oxidized organics (Fig. S6). However, a slight lag period was observed in the overnight peaks of NOCs, as compared to those of the oxidized organics. This finding was consistent with previously reported results, showing NOCs to have concentration maxima overnight in Beijing and Ulaanbaatar (Yuan et al., 2016; Zhang et al., 2015). The lower contribution of NOCs during daytime may be partly explained by the lower RH, as discussed in section 3.2, in addition to photo-bleaching which occurs during daytime (Zhao et al., 2015).

Interestingly, the relationship between NOCs and ammonium was distinctly different from the relationship between NOCs and oxidized organics. A positive correlation ( $R^2 = 0.50, p < 0.01$ ) was observed between the hourly detected number of NOCs and ammonium. In contrast, a negative correlation ( $R^2 = 0.55, p < 0.01$ ) was observed between the hourly average relative peak areas (RPAs) of NOCs and ammonium (Fig. 3). This implies that the controlling factors on the formation of NOCs from ammonium are different from those controlling oxidized organics. On one hand, the positive correlation between the detected numbers reflects that the formation of NOCs does require the participation of  $\text{NH}_3/\text{NH}_4^+$ , consistent with the enhancement of NOCs in ammonium-containing particles discussed above. On the other hand, the negative correlation between the RPAs signifies that particles with higher relative ammonium content may inhibit the formation of NOCs. the relative amount of ammonium may influence the formation of NOCs. Consistently, there is a negative correlation between concentrations of WSON and  $\text{NH}_4^+$  in filter samples (Fig. S6).

---

This is supported by the inverse correlation between that Nfs of ammonium that internally mixed with NOCs and the RPAs of ammonium (Fig. S7). This is also theoretically possible since the formation of NOCs may be influenced by particle acidity (Miyazaki et al., 2014; Aiona et al., 2017; Nguyen et al., 2012), which is substantially affected by the abundance of ammonium. Particle acidity could also play a significant role in the gas-to-particle partitioning of aldehydes (Herrmann et al., 2015; Liggio et al., 2005; Gen et al., 2018; De Haan et al., 2018; Kroll et al., 2005), precursors for the formation of oxidized organics. Consistently, higher relative acidity was observed for the internally mixed ammonium and NOCs particles, compared to ammonium-containing particles without NOCs (Fig. S6), and thus may influence the formation of NOCs (Fig. S7). However, the higher relative acidity might also be a result of NOCs formation. A model simulation shows that after including the chemistry of SOA ageing with NH<sub>3</sub>, an increase in aerosol acidity would be expected due to the reduction in ammonium (Zhu et al., 2018). It is also noted that the particle acidity is roughly estimated by the relative abundance of ammonium, nitrate, and sulfate in individual particles (Denkenberger et al., 2007), and thus may not be representative of actual aerosol acidity or pH (Guo et al., 2015; Hennigan et al., 2015; Murphy et al., 2017). In addition, ammonia in gas phase is also efficient at producing NOCs (Nguyen et al., 2012), which may play a complex role in the distribution of ammonium and NOCs in particulate phase. The formation of ammonium and NOCs would compete for ammonia, which may also potentially result in the negative correlation between the RPAs of NOCs and ammonium. Unfortunately, such a role remains unclear since the variations of ammonia were not available in the present

study. This finding was consistent with the results discussed in section 3.1, indicating that particles containing a higher abundance of ammonium may not facilitate the formation of NOCs.

Similarly, ambient observations reported from a forest site in Japan indicate that aerosol acidity likely plays an important role in the formation of WSON via acid-catalyzed reactions in summer (Miyazaki et al., 2014). Enhanced organic aerosol yields from gas-phase carbonyls in the acidic seed aerosol have been attributed to the occurrence of acid-catalyzed reactions (Jang et al., 2002). Furthermore, acidity could also play a significant role in the gas-to-particle partitioning of aldehydes (Herrmann et al., 2015; Liggio et al., 2005; Gen et al., 2018; De Haan et al., 2018; Kroll et al., 2005), although some studies have indicated that browning of some SOA occurs independently within a pH range of 4–10 (Nguyen et al., 2012). Consistently higher relative acidity was observed for the internally mixed ammonium and NOCs particles, as compared to ammonium-containing particles without NOCs (Fig. S7). This may be due to the fact that the ammonium available to react with secondary oxidized organics was from the uptake of ammonia, regarding that NOCs were mainly supplied by heterogeneous reactions of oxidized organics, as discussed above. In this case, the formation of ammonium and NOCs would compete for ammonia, potentially resulting in a negative correlation between the RPA of NOCs and ammonium as observed (Fig. 3). A study shows that ammonia is more efficient at producing NOC than ammonium (Nguyen et al., 2012). The negative correlation between concentrations of WSON and  $\text{NH}_4^+$  in filter samples (Fig. S7), may serve as quantitative support for the close association between

带格式的：缩进：首行缩进： 2 字符

域代码已更改

域代码已更改

域代码已更改

WSO<sub>2</sub> formation and NH<sub>4</sub><sup>+</sup>. Furthermore, the negative correlation between the RPA of NOCs and ammonium, may indicate that the formation of NOCs is influenced by particle acidity. Consistently, the Nfs of ammonium that internally mixed with NOCs were inversely correlated with the RPAs of ammonium (Fig. S8) (Guo, 2015 #22779; Hennigan, 2015 #22780; Murphy, 2017 #22781) which is directly affected by the abundance of ammonium (as discussed in section 3.3). Consistently, the Nfs of ammonium that internally mixed with NOCs were inversely correlated with the RPAs of ammonium (Fig. S8).

One may expect that NOCs were formed through the interactions between NO<sub>x</sub> and oxidized organics in gas phase followed by condensation (Fry et al., 2014; Stefenelli et al., 2019; Lehtipalo et al., 2018). However, low correlation coefficients ( $R^2 = 0.02 - 0.13$ ) between NOCs and NO<sub>x</sub> indicates limited contribution of this pathways to the observed NOCs. Also, NOCs formed through NO<sub>x</sub> and oxidized organics followed by partitioning would not be dependent on the amount of ammonium, which is incompatible with our results.

Multiple linear regression analysis was performed to predict the RPAs of NOCs generated from oxidized organics and ammonium, showing a close association ( $R^2 = 0.71$ ,  $p < 0.01$ ) between the predicted RPAs and the observed values of NOCs (Fig. 4). Therefore, the interactions involving oxidized organics and ammonium may explain over half of the observed variations in NOCs in the atmosphere of Guangzhou. A fraction of the unaccounted NOCs could be due to primary emissions and other formation pathways.

### 3.2 Factors contributing to the NOCs resolved by positive matrix factorization (PMF) analysis



~~Consistent results were also obtained from the PMF model analysis (Norris et al., 2009)~~  
~~(detailed information is provided in the SI).~~ Figure 5 presents the PMF factor profiles  
~~obtained from the PMF model analysis (detailed information is provided in the SI) (Norris~~  
~~et al., 2009)~~ and their diurnal variations. Around 75% of NOCs could be well explained by  
two factors, with 33% of the ~~modelled~~PMF resolved NOCs mainly associated with  
ammonium and carbonaceous ion peaks (ammonium factor), while 59% were mainly  
associated with oxidized organics (oxidized organics factor). The explained fraction of  
NOCs by the ammonium and oxidized organic factors is consistent with the linear regression  
analysis. In addition, PMF analysis provided information on the factor contribution and  
diurnal variations, which may help explain the seasonal variations and processes of NOCs.  
The ammonium factor showed a diurnal variation pattern peaking during early morning,  
which is consistent with the diurnal variation in RH (Zhang et al., 2019). ~~In addition,~~ This  
factor contributed to ~80% (Fig. S8) of the ~~PMF resolved modelled~~ NOCs during spring  
~~with when~~ the highest RH ~~was observed~~ (Table S1), ~~whereas,~~ while the oxidized organics  
factor dominated (> 80%) in ~~all summer and fall~~ other seasons. In winter, these two factors  
similarly contributed (~40%). This may indicate a potential role of aqueous pathways in the  
formation of NOCs, particularly during spring. Differently, the oxidized organics factor  
showed a pattern of diurnal variation, increasing from morning hours and peaking overnight,  
which may correspond to the photochemical production of oxidized organics and follow-  
~~up~~ interactions with condensed ammonium. This pathway may explain the slightly late  
peaking of NOCs compared to oxidized organics, as ~~condensation of~~ ammonium

condensation is favorable overnight (Hu et al., 2008). While there were similarities in the fractions of oxidized organics in the oxalate factor and the oxidized organics factor, they only contributed to 8% of the PMF resolved modelled-NOCs in the oxalate factor, which contained ~80% of the PMF resolved modelled oxalate. As previously discussed, these oxidized organics are also precursors for the formation of oxalate (Zhang et al., 2019). Therefore, the PMF results, and therefore, these results suggest that there ~~were~~ are two competitive pathways for the evolution of these oxidized organics. Some oxidized organics formed from photochemical activities were further oxidized to oxalate, resulting in a diurnal pattern of variation ~~and with~~ concentration peaks during the afternoon (Fig. 5), while others interact with NH<sub>3</sub>/NH<sub>4</sub><sup>+</sup> ammonium to form NOCs, peaking during the nighttime. However, the controlling factors for these pathways could not be determined in the present study. The unexplained NOCs (~25%) might be linked to the primary emissions, such as biomass burning (Desyaterik et al., 2013). It could be partly supported by the presence of potassium and various carbon ion clusters (C<sub>n</sub><sup>+/·</sup>, n = 1, 2, 3, ...) in the mass spectrum of NOCs-containing particles (Fig. 1).

### **3.2.3 Seasonal variations in the observed NOCs**

There is a clear seasonal variation ~~in of~~ NOCs ~~were also observed~~, with higher relative contributions during summer and autumn (Figs. 3 and 4), mainly due to the variations in oxidized organics and NH<sub>3</sub>/NH<sub>4</sub><sup>+</sup>. ~~As discussed in section 3.3, particle acidity was lower~~

during spring and winter than during summer and autumn, which may contribute to the observed seasonal variations. In this region, a larger contribution from secondary oxidized organics is typically observed during summer and autumn (Zhou et al., 2014; Yuan et al., 2018). The seasonal maximum  $\text{NH}_3$  concentrations have also been reported during the warmer seasons, corresponding to the peak emissions from agricultural activities and high temperatures, while the low  $\text{NH}_3$  concentrations observed in colder seasons may be attributed to gas-to-particle conversion (Pan et al., 2018; Zheng et al., 2012). Such seasonal variation in NOCs ~~were-is~~ also obtained in a model simulation, showing that the conversion of  $\text{NH}_3$  into NOCs would result in a significantly higher reduction of gas-phase  $\text{NH}_3$  during summer (67%) than winter (31%), due to the higher  $\text{NH}_3$  and SOA concentrations present in the summer (Zhu et al., 2018). More primary NOCs may also be present during summer and autumn in the present study, due to the additional biomass burning activities in these seasons (Chen et al., 2018; Zhang et al., 2013).

~~While~~ The seasonal variations ~~in-of~~ NOCs can be adequately explained by the variations in concentrations of oxidized organics and ammonium (Fig. 4), although the hourly variations during each season ~~were-are~~ not well explained, as indicated by the lower  $R^2$  values (Table S2). The correlation coefficients ( $R^2$ ) ranged from 0.24 to 0.57 for inter-seasonal variations, ~~although all the regressions were found to be significant. As shown in Fig. 3, the seasonal dependence~~ variation of NOCs on oxidized organics and ammonium ~~varies~~ was dependent on seasons, despite the correlations between NOCs and oxidized organics / ammonium being significant ( $p < 0.01$ ) over different seasons. During spring,

NOCs exhibit~~ed~~ a limited dependence on oxidized organics (Figs. 3a and 3b), while during summer, the hourly detected number of NOCs show~~ed~~ a limited dependence on ammonium (Fig. 3d). These ~~findings results can be explained by were consistent with~~ the PMF results, showing that the ammonium factor explained ~80% of the predicted NOCs during spring, while the oxidized organics factor dominantly contributed to the predicted NOCs during warmer seasons (Fig. S8). A detailed discussion of this issue is provided in the SI.

#### 3.3.4 Influence of RH and ~~particle acidity~~ NO<sub>x</sub>

The ~~importance influence~~ of RH on ~~NOC~~ RPAs ~~of NOCs~~ and peak ratios of NOCs ~~and~~ /oxidized organics, are shown in Fig. 6. While NOCs ~~did do~~ not show a clear dependence on RH, the ratio of NOCs to oxidized organics show~~ed~~ a clear increase ~~with towards~~ higher RH. This finding is consistent with the observations reported by Xu et al. (2017), in which the N/C ratio significantly increase~~ed~~ as a function of RH in the atmosphere of Beijing. In addition, the diurnal variations of NOCs with peaks values around 20:00 ~~were are~~ also similar to those reported by Xu et al. (2017). ~~It is The peak ratios of noted that the formation of NOCs from oxidized organics was are more obviously not enhanced when RH is higher conditions were lower than 40%.~~ These findings imply that aqueous-phase processing likely plays an important role in the formation of NOCs. Significant changes in RH, such as during the evaporation of water droplets, have been reported to facilitate the formation of NOCs via NH<sub>3</sub>/NH<sub>4</sub><sup>+</sup> and SOA (Nguyen et al., 2012). In addition, an increase in RH would improve the uptake of NH<sub>3</sub> and formation of NH<sub>4</sub><sup>+</sup>, which also contributes to the enhancement of

NOCs. However, the relatively weak correlation ( $R^2 = 0.27$ ,  $p < 0.01$ ) between the peak ratios and RH, reflect the complex influence of RH on the formation of NOCs (Xu et al., 2017; Woo et al., 2013). ~~It is noted that the formation of NOCs from oxidized organics was not enhanced when RH conditions were lower than 40%.~~

~~While particulate organics with a high N/C ratio were formed in the presence of ammonium salts (Lee et al., 2013), the influence of particle acidity on the formation of NOCs has not previously been thoroughly evaluated. We further analyzed the influence of particle acidity on the formation of NOCs, with particle acidity represented by the relative acidity ratio, defined as the sum of absolute average peak areas of nitrate ( $m/z$  62) and sulfate ( $m/z$  97) divided by those of ammonium ( $m/z$  18) (Denkenberger et al., 2007). Fig. 7 clearly shows the dependence of NOCs on particle acidity. Similarly, ambient observations reported from a forest site in Japan indicate that aerosol acidity likely plays an important role in the formation of WSON via acid-catalyzed reactions in summer (Miyazaki et al., 2014). Enhanced organic aerosol yields from gas-phase carbonyls in the acidic seed aerosol have been attributed to the occurrence of acid-catalyzed reactions (Jang et al., 2002). Furthermore, acidity could also play a significant role in the gas to particle partitioning of aldehydes (Herrmann et al., 2015; Liggio et al., 2005; Gen et al., 2018; De Haan et al., 2018; Kroll et al., 2005), although some studies have indicated that browning of some SOA occurs independently within a pH range of 4–10 (Nguyen et al., 2012). Consistently higher relative acidity was observed for the internally mixed ammonium and NOCs particles, as compared to ammonium-containing particles without NOCs (Fig. S7). This finding was consistent with~~

---

the results discussed in section 3.1, indicating that particles containing a higher abundance of ammonium may not facilitate the formation of NOCs. A previously reported modelled simulation showed that after including the chemistry of SOA ageing with  $\text{NH}_3$ , an increase in aerosol acidity would be expected due to the reduction in  $\text{NH}_4^+$ , resulting in more SOA generated from acid-catalyzed reactions (Zhu et al., 2018). Consequently, the relative acidity ratio was also included in the multiple linear regression model applied in the present study, as previously discussed. However, the inclusion of relative acidity did not improve the degree of fit between the observed and modeled RPAs of NOCs. This suggests that the selection of the RPAs of ammonium or the relative acidity ratio in regression analysis resulted in similar outcomes for the formation of NOCs as the present study, due to the overlap between these variables. Sulfate might also play a role in the enhancement of formation kinetics for NOCs ( $R^2 = 0.13, p < 0.01$ ), as previously demonstrated in laboratory simulations showing that sulfate can enhance the partitioning of some carbonyls (Lee et al., 2013).

One may expect that NOCs were formed through the interactions between  $\text{NO}_x$  and oxidized organics in gas phase followed by condensation (Fry et al., 2014; Stefenelli et al., 2019; Lehtipalo et al., 2018). Low correlation coefficients ( $R^2 = 0.02\text{--}0.13$ ) between NOCs and  $\text{NO}_x$  likely indicates limited contribution of this pathways to the observed NOCs. We have also included an analysis on the relationship between peak ratios of NOCs/oxidized organics and  $\text{NO}_x$ . Peak area ratios of NOCs/oxidized organics generally increases with increasing level of  $\text{NO}_x$  (Fig. 6), but still with relatively weak correlation ( $R^2 = 0.18, p <$

---

0.01). An inclusion of both NO<sub>x</sub> and RH in the above linear regression model (NOCs versus the oxidized organics and ammonium) does not improve the prediction of NOCs ( $R^2 = 0.71$ ,  $p < 0.01$ ). However, it is also noted that many factors (e.g., different removal processes and lifetimes of particles vs. gasses, primary vs. secondary species, etc.) could contribute to a lack of strong correlation even if NO<sub>x</sub> did contribute to NOC formation.

### **3.4.5 Atmospheric implications and limitation**

In this study we showed that in an urban megacity area, secondary NOCs were significantly contributed by the heterogeneous ageing of ~~oxidized organics photochemical products~~ with NH<sub>3</sub>/NH<sub>4</sub><sup>+</sup>, providing valuable insight into SOA aging mechanisms. In particular, the effects of NH<sub>3</sub>/NH<sub>4</sub><sup>+</sup> on SOA or BrC formation remain relatively poorly understood. In the PRD region, it has been shown that oxygenated organic aerosols (OOA) account for more than 40% the total organic mass (He et al., 2011), with high concentrations of available gaseous carbonyls (Li et al., 2014). Therefore, it is expected that over half of all water soluble NOCs in this region ~~might~~ link to secondary processing (Yu et al., 2017). Furthermore, secondary sources have been found to contribute significantly to NOCs related BrC in Nanjing, China (Chen et al., 2018). The results presented herein also suggest that the production of NOCs might be effectively estimated by their correlation with secondary oxidized organics and ammonium. The effectiveness of correlation-based estimations needs to be examined in other regions before being generally applied in other environments. However, this approach may provide valuable insights in investigations into NOCs using

---

atmospheric observations. In contrast, it has previously been reported that a positive correlation exists between WSON and ammonium (Li et al., 2012), indicating similar anthropogenic sources. This divergence could be mainly attributed to varying contributions of primary sources and secondary processes to the observed NOCs. Possible future reductions in anthropogenic emissions of ammonia may reduce particle NOCs. Understanding the complex interplay between inorganic and organic nitrogen is an important part of assessing the global nitrogen cycling.

Moise et al. (2015) proposed that with high concentrations of reduced nitrogen compounds, high photochemical activity and frequent changes in humidity, BrC formed via  $\text{NH}_3/\text{NH}_4^+$  and SOA may become a dominant contributor to aerosol absorption, specifically in agricultural and forested areas. However, this study suggests that even in typical urban areas, BrC formation via  $\text{NH}_3/\text{NH}_4^+$  and SOA should not be ~~considered~~neglected. In particular, SOA was found to account for 44 – 71% of the organic mass in megacities across China (Huang et al., 2014), with  $\text{NH}_3$  concentrations in urban areas comparable with those from agricultural sites and 2- or 3-fold those of forested areas in China (Pan et al., 2018). Additionally, the acidic nature of particles in these regions would be also favorable for the formation of NOCs (Guo et al., 2017; Jia et al., 2018).

Considering the formation of NOCs from the uptake of  $\text{NH}_3$  onto SOA particles, Zhu et al. (2018) suggested that this mechanism could have a significant impact on the atmospheric concentrations of  $\text{NH}_3/\text{NH}_4^+$  and  $\text{NO}_3^-$ . ~~However, the uptake of carbonyl onto the ammonium-containing particles was not considered. As discussed above, 33% of the~~



---

modelled NOCs on average could be explained by the ammonium factor, with this effect most pronounced during spring (Fig. 5 and Fig. S9). Such chemistry may also result in an increase in aerosol acidity due to the reduction in  $\text{NH}_4^+$ , resulting in the formation of more SOA from acid-catalyzed reactions of gas-phase carbonyls (Jang et al., 2002). Given that RH and particle acidity play an important role in the aqueous formation of SOA and uptake of  $\text{NH}_3$ , such models should be developed to include these factors, in order to improve our understanding of the impact of the discussed chemical mechanisms in atmospheric chemistry and the global nitrogen cycle.

## 5 Conclusions

This study investigated the processes contributing to the seasonal formation of NOCs, involving ammonium and oxidized organics in urban Guangzhou, using single particle mass spectrometry. This is the first study to provide direct field observation results to confirm that the variation ~~in~~of NOCs correlated well and are strongly enhanced internal mixing with secondary oxidized organics. These findings highlight the possible formation pathway of NOCs through ageing of secondary oxidized organics by  $\text{NH}_3/\text{NH}_4^+$  in ambient urban environments. A clear pattern of seasonal variation in NOCs was observed, with higher relative contributions in summer and autumn as compared to spring and winter. This seasonal variation was well predicted by multiple linear regression model analysis, using the relative abundance of oxidized organics and ammonium as model inputs. More than 50% of NOCs could be explained by the interaction between oxidized organics and ammonium. The

---

production of NOCs through such processes were facilitated by increased humidity and NO<sub>x</sub>  
~~and higher particle acidity~~. These results extend our understanding of the mixing state and  
atmospheric processing of particulate NOCs, as well as having important implications for  
the accuracy of models predicting the formation, fate and impacts of NOCs in the atmosphere.

#### **Author contribution**

GHZ and XHB designed the research (with input from WS, LL, ZYW, DHC, MJT, XMW  
and GYS), analyzed the data, and wrote the manuscript. XFL, YZF and QHL conducted air  
sampling work and laboratory experiments under the guidance of GHZ, XHB and XMW.  
All authors contributed to the refinement of the submitted manuscript.

#### **Acknowledgement**

This work was supported by the National Nature Science Foundation of China  
(No. 41775124 and 41877307), the National Key Research and Development Program of  
China (2017YFC0210104 and 2016YFC0202204), the Science and Technology Project of  
Guangzhou, China (No. 201803030032), and the Guangdong Foundation for Program of  
Science and Technology Research (No. 2017B030314057).

---

538 **References**

- 539 Aiona, P. K., Lee, H. J., Leslie, R., Lin, P., Laskin, A., Laskin, J., and Nizkorodov, S. A.:  
540 Photochemistry of Products of the Aqueous Reaction of Methylglyoxal with Ammonium  
541 Sulfate, *Acs Earth Space Chem.*, 1, 522-532, doi:10.1021/acsearthspacechem.7b00075, 2017.
- 542 Altieri, K. E., Turpin, B. J., and Seitzinger, S. P.: Composition of Dissolved Organic  
543 Nitrogen in Continental Precipitation Investigated by Ultra-High Resolution FT-ICR Mass  
544 Spectrometry, *Environ. Sci. Technol.*, 43, 6950-6955, doi:10.1021/es9007849, 2009.
- 545 Andreae, M. O., and Gelencser, A.: Black carbon or brown carbon? The nature of light-  
546 absorbing carbonaceous aerosols, *Atmos. Chem. Phys.*, 6, 3131-3148, 2006.
- 547 Bones, D. L., Henricksen, D. K., Mang, S. A., Gonsior, M., Bateman, A. P., Nguyen, T.  
548 B., Cooper, W. J., and Nizkorodov, S. A.: Appearance of strong absorbers and fluorophores in  
549 limonene-O-3 secondary organic aerosol due to NH<sub>4</sub><sup>+</sup>-mediated chemical aging over long time  
550 scales, *J. Geophys. Res.-Atmos.*, 115, D05203, doi:10.1029/2009jd012864, 2010.
- 551 Cape, J. N., Cornell, S. E., Jickells, T. D., and Nemitz, E.: Organic nitrogen in the  
552 atmosphere — Where does it come from? A review of sources and methods, *Atmos. Res.*, 102,  
553 30-48, doi:10.1016/j.atmosres.2011.07.009, 2011.
- 554 Chen, Y., Ge, X., Chen, H., Xie, X., Chen, Y., Wang, J., Ye, Z., Bao, M., Zhang, Y., and  
555 Chen, M.: Seasonal light absorption properties of water-soluble brown carbon in atmospheric  
556 fine particles in Nanjing, China, *Atmos. Environ.*, doi:10.1016/j.atmosenv.2018.06.002, 2018.
- 557 Chu, B. W., Zhang, X., Liu, Y. C., He, H., Sun, Y., Jiang, J. K., Li, J. H., and Hao, J. M.:  
558 Synergetic formation of secondary inorganic and organic aerosol: effect of SO<sub>2</sub> and NH<sub>3</sub> on  
559 particle formation and growth, *Atmos. Chem. Phys.*, 16, 14219-14230, doi:10.5194/acp-16-  
560 14219-2016, 2016.
- 561 De Gouw, J., and Jimenez, J. L.: Organic Aerosols in the Earth's Atmosphere, *Environ.*  
562 *Sci. Technol.*, 43, 7614-7618, doi:10.1021/Es9006004, 2009.
- 563 De Haan, D. O., Hawkins, L. N., Kononenko, J. A., Turley, J. J., Corrigan, A. L., Tolbert,  
564 M. A., and Jimenez, J. L.: Formation of Nitrogen-Containing Oligomers by Methylglyoxal and

---

565 Amines in Simulated Evaporating Cloud Droplets, *Environ. Sci. Technol.*, 45, 984-991,  
 566 doi:10.1021/es102933x, 2011.

567 De Haan, D. O., Hawkins, L. N., Welsh, H. G., Pednekar, R., Casar, J. R., Pennington, E.  
 568 A., de Loera, A., Jimenez, N. G., Symons, M. A., Zauscher, M., Pajunoja, A., Caponi, L.,  
 569 Cazaunau, M., Formenti, P., Gratien, A., Pangu, E., and Doussin, J.-F.: Brown Carbon  
 570 Production in Ammonium- or Amine-Containing Aerosol Particles by Reactive Uptake of  
 571 Methylglyoxal and Photolytic Cloud Cycling, *Environ. Sci. Technol.*, 51, 7458-7466,  
 572 doi:10.1021/acs.est.7b00159, 2017.

573 De Haan, D. O., Jimenez, N. G., de Loera, A., Cazaunau, M., Gratien, A., Pangu, E., and  
 574 Doussin, J.-F.: Methylglyoxal Uptake Coefficients on Aqueous Aerosol Surfaces, *J. Phys.*  
 575 *Chem. A*, 122, 4854-4860, doi:10.1021/acs.jpca.8b00533, 2018.

576 Denkenberger, K. A., Moffet, R. C., Holecek, J. C., Rebotier, T. P., and Prather, K. A.:  
 577 Real-time, single-particle measurements of oligomers in aged ambient aerosol particles,  
 578 *Environ. Sci. Technol.*, 41, 5439-5446, doi:10.1021/es070329l, 2007.

579 Desyaterik, Y., Sun, Y., Shen, X., Lee, T., Wang, X., Wang, T., and Collett, J. L., Jr.:  
 580 Speciation of "brown" carbon in cloud water impacted by agricultural biomass burning in  
 581 eastern China, *J. Geophys. Res.-Atmos.*, 118, 7389-7399, doi:10.1002/jgrd.50561, 2013.

582 El-Sayed, M. M. H., Wang, Y. Q., and Hennigan, C. J.: Direct atmospheric evidence for  
 583 the irreversible formation of aqueous secondary organic aerosol, *Geophys. Res. Lett.*, 42, 5577-  
 584 5586, doi:10.1002/2015gl064556, 2015.

585 Feng, Y., Ramanathan, V., and Kotamarthi, V. R.: Brown carbon: a significant  
 586 atmospheric absorber of solar radiation?, *Atmos. Chem. Phys.*, 13, 8607-8621,  
 587 doi:10.5194/acp-13-8607-2013, 2013.

588 Fry, J. L., Draper, D. C., Barsanti, K. C., Smith, J. N., Ortega, J., Winkle, P. M., Lawler,  
 589 M. J., Brown, S. S., Edwards, P. M., Cohen, R. C., and Lee, L.: Secondary Organic Aerosol  
 590 Formation and Organic Nitrate Yield from NO<sub>3</sub> Oxidation of Biogenic Hydrocarbons, *Environ.*  
 591 *Sci. Technol.*, 48, 11944-11953, doi:10.1021/es502204x, 2014.

---

592 Galloway, M. M., Chhabra, P. S., Chan, A. W. H., Surratt, J. D., Flagan, R. C., Seinfeld,  
 593 J. H., and Keutsch, F. N.: Glyoxal uptake on ammonium sulphate seed aerosol: reaction  
 594 products and reversibility of uptake under dark and irradiated conditions, *Atmos. Chem. Phys.*,  
 595 9, 3331-3345, doi:10.5194/acp-9-3331-2009, 2009.

596 Gen, M., Huang, D. D., and Chan, C. K.: Reactive Uptake of Glyoxal by Ammonium-  
 597 Containing Salt Particles as a Function of Relative Humidity, *Environ. Sci. Technol.*, 52, 6903-  
 598 6911, doi:10.1021/acs.est.8b00606, 2018.

599 Guo, H., Xu, L., Bougiatioti, A., Cerully, K. M., Capps, S. L., Hite, J. R., Carlton, A. G.,  
 600 Lee, S. H., Bergin, M. H., Ng, N. L., Nenes, A., and Weber, R. J.: Fine-particle water and pH  
 601 in the southeastern United States, *Atmos. Chem. Phys.*, 15, 5211-5228, doi:10.5194/acp-15-  
 602 5211-2015, 2015.

603 Guo, H., Weber, R. J., and Nenes, A.: High levels of ammonia do not raise fine particle  
 604 pH sufficiently to yield nitrogen oxide-dominated sulfate production, *Sci. Rep.*, 7, 12109,  
 605 doi:10.1038/s41598-017-11704-0, 2017.

606 Hawkins, L. N., Lemire, A. N., Galloway, M. M., Corrigan, A. L., Turley, J. J., Espelien,  
 607 B. M., and De Haan, D. O.: Maillard Chemistry in Clouds and Aqueous Aerosol As a Source  
 608 of Atmospheric Humic-Like Substances, *Environ. Sci. Technol.*, 50, 7443-7452,  
 609 doi:10.1021/acs.est.6b00909, 2016.

610 He, L. Y., Huang, X. F., Xue, L., Hu, M., Lin, Y., Zheng, J., Zhang, R. Y., and Zhang, Y.  
 611 H.: Submicron aerosol analysis and organic source apportionment in an urban atmosphere in  
 612 Pearl River Delta of China using high-resolution aerosol mass spectrometry, *J. Geophys. Res.-*  
 613 *Atmos.*, 116, 1-15, doi:10.1029/2010jd014566, 2011.

614 Healy, R. M., Sciare, J., Poulain, L., Crippa, M., Wiedensohler, A., Prevot, A. S. H.,  
 615 Baltensperger, U., Sarda-Esteve, R., McGuire, M. L., Jeong, C. H., McGillicuddy, E., O'Connor,  
 616 I. P., Sodeau, J. R., Evans, G. J., and Wenger, J. C.: Quantitative determination of carbonaceous  
 617 particle mixing state in Paris using single-particle mass spectrometer and aerosol mass  
 618 spectrometer measurements, *Atmos. Chem. Phys.*, 13, 9479-9496, doi:10.5194/acp-13-9479-  
 619 2013, 2013.

---

620 Hennigan, C. J., Izumi, J., Sullivan, A. P., Weber, R. J., and Nenes, A.: A critical  
 621 evaluation of proxy methods used to estimate the acidity of atmospheric particles, *Atmos. Chem.*  
 622 *Phys.*, 15, 2775-2790, doi:10.5194/acp-15-2775-2015, 2015.

623 Herrmann, H., Schaefer, T., Tilgner, A., Styler, S. A., Weller, C., Teich, M., and Otto, T.:  
 624 Tropospheric Aqueous-Phase Chemistry: Kinetics, Mechanisms, and Its Coupling to a  
 625 Changing Gas Phase, *Chem. Rev.*, 115, 4259-4334, doi:10.1021/cr500447k, 2015.

626 Ho, K. F., Ho, S. S. H., Lee, S. C., Kawamura, K., Zou, S. C., Cao, J. J., and Xu, H. M.:  
 627 Summer and winter variations of dicarboxylic acids, fatty acids and benzoic acid in PM<sub>2.5</sub> in  
 628 Pearl Delta River Region, China, *Atmos. Chem. Phys.*, 11, 2197-2208, doi:10.5194/acp-11-  
 629 2197-2011, 2011.

630 Ho, K. F., Ho, S. S. H., Huang, R. J., Liu, S. X., Cao, J. J., Zhang, T., Chuang, H. C., Chan,  
 631 C. S., Hu, D., and Tian, L. W.: Characteristics of water-soluble organic nitrogen in fine  
 632 particulate matter in the continental area of China, *Atmos. Environ.*, 106, 252-261,  
 633 doi:10.1016/j.atmosenv.2015.02.010, 2015.

634 Hu, M., Wu, Z., Slanina, J., Lin, P., Liu, S., and Zeng, L.: Acidic gases, ammonia and  
 635 water-soluble ions in PM<sub>2.5</sub> at a coastal site in the Pearl River Delta, China, *Atmos. Environ.*,  
 636 42, 6310-6320, 2008.

637 Huang, M., Xu, J., Cai, S., Liu, X., Zhao, W., Hu, C., Gu, X., Fang, L., and Zhang, W.:  
 638 Characterization of brown carbon constituents of benzene secondary organic aerosol aged with  
 639 ammonia, *J. Atmos. Chem.*, 75, 205-218, doi:10.1007/s10874-017-9372-x, 2017.

640 Huang, R. J., Zhang, Y., Bozzetti, C., Ho, K. F., Cao, J. J., Han, Y., Daellenbach, K. R.,  
 641 Slowik, J. G., Platt, S. M., Canonaco, F., Zotter, P., Wolf, R., Pieber, S. M., Bruns, E. A., Crippa,  
 642 M., Ciarelli, G., Piazzalunga, A., Schwikowski, M., Abbaszade, G., Schnelle-Kreis, J.,  
 643 Zimmermann, R., An, Z., Szidat, S., Baltensperger, U., El Haddad, I., and Prevot, A. S.: High  
 644 secondary aerosol contribution to particulate pollution during haze events in China, *Nature*, 514,  
 645 218-222, doi:10.1038/nature13774, 2014.

---

646 Jeong, C. H., McGuire, M. L., Godri, K. J., Slowik, J. G., Rehbein, P. J. G., and Evans, G.  
 647 J.: Quantification of aerosol chemical composition using continuous single particle  
 648 measurements, *Atmos. Chem. Phys.*, 11, 7027-7044, doi:10.5194/acp-11-7027-2011, 2011.  
 649 Jia, S. G., Sarkar, S., Zhang, Q., Wang, X. M., Wu, L. L., Chen, W. H., Huang, M. J.,  
 650 Zhou, S. Z., Zhang, J. P., Yuan, L., and Yang, L. M.: Characterization of diurnal variations of  
 651 PM<sub>2.5</sub> acidity using an open thermodynamic system: A case study of Guangzhou, China,  
 652 *Chemosphere*, 202, 677-685, doi:10.1016/j.chemosphere.2018.03.127, 2018.  
 653 Kampf, C. J., Filippi, A., Zuth, C., Hoffmann, T., and Opatz, T.: Secondary brown carbon  
 654 formation via the dicarbonyl imine pathway: nitrogen heterocycle formation and synergistic  
 655 effects, *Phys. Chem. Chem. Phys.*, 18, 18353-18364, doi:10.1039/c6cp03029g, 2016.  
 656 Kanakidou, M., Seinfeld, J. H., Pandis, S. N., Barnes, I., Dentener, F. J., Facchini, M. C.,  
 657 Van Dingenen, R., Ervens, B., Nenes, A., Nielsen, C. J., Swietlicki, E., Putaud, J. P., Balkanski,  
 658 Y., Fuzzi, S., Horth, J., Moortgat, G. K., Winterhalter, R., Myhre, C. E. L., Tsigaridis, K.,  
 659 Vignati, E., Stephanou, E. G., and Wilson, J.: Organic aerosol and global climate modelling: a  
 660 review, *Atmos. Chem. Phys.*, 5, 1053-1123, 2005.  
 661 Kroll, J. H., Ng, N. L., Murphy, S. M., Varutbangkul, V., Flagan, R. C., and Seinfeld, J.  
 662 H.: Chamber studies of secondary organic aerosol growth by reactive uptake of simple carbonyl  
 663 compounds, *J. Geophys. Res.-Atmos.*, 110, doi:10.1029/2005JD006004, 2005.  
 664 Laskin, A., Smith, J. S., and Laskin, J.: Molecular Characterization of Nitrogen-  
 665 Containing Organic Compounds in Biomass Burning Aerosols Using High-Resolution Mass  
 666 Spectrometry, *Environ. Sci. Technol.*, 43, 3764-3771, doi:10.1021/es803456n, 2009.  
 667 Laskin, A., Laskin, J., and Nizkorodov, S. A.: Chemistry of Atmospheric Brown Carbon,  
 668 *Chem. Rev.*, 115, 4335-4382, doi:10.1021/cr5006167, 2015.  
 669 Lee, A. K. Y., Zhao, R., Li, R., Liggio, J., Li, S. M., and Abbatt, J. P. D.: Formation of  
 670 Light Absorbing Organo-Nitrogen Species from Evaporation of Droplets Containing Glyoxal  
 671 and Ammonium Sulfate, *Environ. Sci. Technol.*, 47, 12819-12826, doi:10.1021/es402687w,  
 672 2013.

---

673 Lee, S. H., Murphy, D. M., Thomson, D. S., and Middlebrook, A. M.: Nitrate and oxidized  
 674 organic ions in single particle mass spectra during the 1999 Atlanta Supersite Project, *J.*  
 675 *Geophys. Res.*, 108, 8417, doi:10.1029/2001jd001455, 2003.

676 Lehtipalo, K., Yan, C., Dada, L., Bianchi, F., Xiao, M., Wagner, R., Stolzenburg, D.,  
 677 Ahonen, L. R., Amorim, A., Baccarini, A., Bauer, P. S., Baumgartner, B., Bergen, A.,  
 678 Bernhammer, A.-K., Breitenlechner, M., Brilke, S., Buchholz, A., Mazon, S. B., Chen, D., Chen,  
 679 X., Dias, A., Dommen, J., Draper, D. C., Duplissy, J., Ehn, M., Finkenzeller, H., Fischer, L.,  
 680 Frege, C., Fuchs, C., Garmash, O., Gordon, H., Hakala, J., He, X., Heikkinen, L., Heinritzi, M.,  
 681 Helm, J. C., Hofbauer, V., Hoyle, C. R., Jokinen, T., Kangasluoma, J., Kerminen, V.-M., Kim,  
 682 C., Kirkby, J., Kontkanen, J., Kürten, A., Lawler, M. J., Mai, H., Mathot, S., Mauldin, R. L.,  
 683 Molteni, U., Nichman, L., Nie, W., Nieminen, T., Ojdanic, A., Onnela, A., Passananti, M.,  
 684 Petäjä, T., Piel, F., Pospisilova, V., Quéléver, L. L. J., Rissanen, M. P., Rose, C., Sarnela, N.,  
 685 Schallhart, S., Schuchmann, S., Sengupta, K., Simon, M., Sipilä, M., Tauber, C., Tomé, A.,  
 686 Tröstl, J., Väisänen, O., Vogel, A. L., Volkamer, R., Wagner, A. C., Wang, M., Weitz, L.,  
 687 Wimmer, D., Ye, P., Ylisirniö, A., Zha, Q., Carslaw, K. S., Curtius, J., Donahue, N. M., Flagan,  
 688 R. C., Hansel, A., Riipinen, I., Virtanen, A., Winkler, P. M., Baltensperger, U., Kulmala, M.,  
 689 and Worsnop, D. R.: Multicomponent new particle formation from sulfuric acid, ammonia, and  
 690 biogenic vapors, *Sci. Adv.*, 4, eaau5363, doi:10.1126/sciadv.aau5363, 2018.

691 Li, J., Fang, Y. T., Yoh, M., Wang, X. M., Wu, Z. Y., Kuang, Y. W., and Wen, D. Z.:  
 692 Organic nitrogen deposition in precipitation in metropolitan Guangzhou city of southern China,  
 693 *Atmos. Res.*, 113, 57-67, doi:10.1016/j.atmosres.2012.04.019, 2012.

694 Li, L., Huang, Z. X., Dong, J. G., Li, M., Gao, W., Nian, H. Q., Fu, Z., Zhang, G. H., Bi,  
 695 X. H., Cheng, P., and Zhou, Z.: Real time bipolar time-of-flight mass spectrometer for analyzing  
 696 single aerosol particles, *Intl. J. Mass. Spectrom.*, 303, 118-124, doi:10.1016/j.ijms.2011.01.017,  
 697 2011.

698 Li, X., Rohrer, F., Brauers, T., Hofzumahaus, A., Lu, K., Shao, M., Zhang, Y. H., and  
 699 Wahner, A.: Modeling of HCHO and CHOCHO at a semi-rural site in southern China during



---

700 the PRIDE-PRD2006 campaign, *Atmos. Chem. Phys.*, 14, 12291-12305, doi:10.5194/acp-14-  
701 12291-2014, 2014.

702 Li, Z. J., Nizkorodov, S. A., Chen, H., Lu, X. H., Yang, X., and Chen, J. M.: Nitrogen-  
703 containing secondary organic aerosol formation by acrolein reaction with ammonia/ammonium,  
704 *Atmos. Chem. Phys.*, 19, 1343-1356, doi:10.5194/acp-19-1343-2019, 2019.

705 Liggio, J., Li, S. M., and McLaren, R.: Reactive uptake of glyoxal by particulate matter, *J.*  
706 *Geophys. Res.-Atmos.*, 110, doi:10.1029/2004jd005113, 2005.

707 Lin, P., Aiona, P. K., Li, Y., Shiraiwa, M., Laskin, J., Nizkorodov, S. A., and Laskin, A.:  
708 Molecular Characterization of Brown Carbon in Biomass Burning Aerosol Particles, *Environ.*  
709 *Sci. Technol.*, 50, 11815-11824, doi:10.1021/acs.est.6603024, 2016.

710 Liu, Y., Liggio, J., Staebler, R., and Li, S. M.: Reactive uptake of ammonia to secondary  
711 organic aerosols: kinetics of organonitrogen formation, *Atmos. Chem. Phys.*, 15, 13569-13584,  
712 doi:10.5194/acp-15-13569-2015, 2015.

713 Mace, K. A., Kubilay, N., and Duce, R. A.: Organic nitrogen in rain and aerosol in the  
714 eastern Mediterranean atmosphere: An association with atmospheric dust, *J. Geophys. Res.-*  
715 *Atmos.*, 108, doi:10.1029/2002jd002997, 2003.

716 Mang, S. A., Henricksen, D. K., Bateman, A. P., Andersen, M. P. S., Blake, D. R., and  
717 Nizkorodov, S. A.: Contribution of Carbonyl Photochemistry to Aging of Atmospheric  
718 Secondary Organic Aerosol, *J. Phys. Chem. A*, 112, 8337-8344, doi:10.1021/jp804376c, 2008.

719 Miyazaki, Y., Fu, P. Q., Ono, K., Tachibana, E., and Kawamura, K.: Seasonal cycles of  
720 water-soluble organic nitrogen aerosols in a deciduous broadleaf forest in northern Japan, *J.*  
721 *Geophys. Res.-Atmos.*, 119, 1440-1454, doi:10.1002/2013JD020713, 2014.

722 Mohr, C., Lopez-Hilfiker, F. D., Zotter, P., Prévôt, A. S. H., Xu, L., Ng, N. L., Herndon,  
723 S. C., Williams, L. R., Franklin, J. P., Zahniser, M. S., Worsnop, D. R., Knighton, W. B., Aiken,  
724 A. C., Gorkowski, K. J., Dubey, M. K., Allan, J. D., and Thornton, J. A.: Contribution of  
725 Nitrated Phenols to Wood Burning Brown Carbon Light Absorption in Detling, United  
726 Kingdom during Winter Time, *Environ. Sci. Technol.*, 47, 6316-6324, doi:10.1021/es400683v,  
727 2013.

---

728 Moise, T., Flores, J. M., and Rudich, Y.: Optical Properties of Secondary Organic Aerosols  
729 and Their Changes by Chemical Processes, *Chem. Rev.*, 115, 4400-4439,  
730 doi:10.1021/cr5005259, 2015.

731 Murphy, J. G., Gregoire, P. K., Tevlin, A. G., Wentworth, G. R., Ellis, R. A., Markovic,  
732 M. Z., and VandenBoer, T. C.: Observational constraints on particle acidity using  
733 measurements and modelling of particles and gases, *Faraday Discuss.*, 200, 379-395,  
734 doi:10.1039/c7fd00086c, 2017.

735 Neff, J. C., Holland, E. A., Dentener, F. J., McDowell, W. H., and Russell, K. M.: The  
736 origin, composition and rates of organic nitrogen deposition: A missing piece of the nitrogen  
737 cycle?, *Biogeochemistry*, 57, 99-136, 2002.

738 Nguyen, T. B., Lee, P. B., Updyke, K. M., Bones, D. L., Laskin, J., Laskin, A., and  
739 Nizkorodov, S. A.: Formation of nitrogen- and sulfur-containing light-absorbing compounds  
740 accelerated by evaporation of water from secondary organic aerosols, *J. Geophys. Res.-Atmos.*,  
741 117, D01207, doi:10.1029/2011jd016944, 2012.

742 Norris, G., Vedantham, R., Wade, K., Zahn, P., Brown, S., Paatero, P., Eberly, S., and  
743 Foley, C. (2009), Guidance document for PMF applications with the Multilinear Engine, edited,  
744 Prepared for the U.S. Environmental Protection Agency, Research Triangle Park, NC.

745 Noziere, B., Dziedzic, P., and Cordova, A.: Products and Kinetics of the Liquid-Phase  
746 Reaction of Glyoxal Catalyzed by Ammonium Ions (NH<sub>4</sub><sup>+</sup>), *J. Phys. Chem. A*, 113, 231-237,  
747 doi:10.1021/jp8078293, 2009.

748 Noziere, B., Kaberer, M., Claeys, M., Allan, J., D'Anna, B., Decesari, S., Finessi, E.,  
749 Glasius, M., Grgic, I., Hamilton, J. F., Hoffmann, T., Iinuma, Y., Jaoui, M., Kahno, A., Kampf,  
750 C. J., Kourtchev, I., Maenhaut, W., Marsden, N., Saarikoski, S., Schnelle-Kreis, J., Surratt, J.  
751 D., Szidat, S., Szmigielski, R., and Wisthaler, A.: The Molecular Identification of Organic  
752 Compounds in the Atmosphere: State of the Art and Challenges, *Chem. Rev.*, 115, 3919-3983,  
753 doi:10.1021/cr5003485, 2015.

754 Pagels, J., Dutcher, D. D., Stolzenburg, M. R., McMurry, P. H., Galli, M. E., and Gross,  
755 D. S.: Fine-particle emissions from solid biofuel combustion studied with single-particle mass

---

756 spectrometry: Identification of markers for organics, soot, and ash components, *J. Geophys.*  
757 *Res.-Atmos.*, 118, 859-870, doi:10.1029/2012jd018389, 2013.

758 Pan, Y. P., Tian, S. L., Zhao, Y. H., Zhang, L., Zhu, X. Y., Gao, J., Huang, W., Zhou, Y.  
759 B., Song, Y., Zhang, Q., and Wang, Y. S.: Identifying Ammonia Hotspots in China Using a  
760 National Observation Network, *Environ. Sci. Technol.*, 52, 3926-3934,  
761 doi:10.1021/acs.est.7b05235, 2018.

762 Paulot, F., Wunch, D., Crounse, J. D., Toon, G. C., Millet, D. B., DeCarlo, P. F.,  
763 Vigouroux, C., Deutscher, N. M., González Abad, G., Notholt, J., Warneke, T., Hannigan, J.  
764 W., Warneke, C., de Gouw, J. A., Dunlea, E. J., De Mazière, M., Griffith, D. W. T., Bernath,  
765 P., Jimenez, J. L., and Wennberg, P. O.: Importance of secondary sources in the atmospheric  
766 budgets of formic and acetic acids, *Atmos. Chem. Phys.*, 11, 1989-2013, doi:10.5194/acp-11-  
767 1989-2011, 2011.

768 Qin, X. Y., Bhawe, P. V., and Prather, K. A.: Comparison of two methods for obtaining  
769 quantitative mass concentrations from aerosol time-of-flight mass spectrometry measurements,  
770 *Anal. Chem.*, 78, 6169-6178, doi:10.1021/ac060395q, 2006.

771 Rastogi, N., Zhang, X., Edgerton, E. S., Ingall, E., and Weber, R. J.: Filterable water-  
772 soluble organic nitrogen in fine particles over the southeastern USA during summer, *Atmos.*  
773 *Environ.*, 45, 6040-6047, doi:10.1016/j.atmosenv.2011.07.045, 2011.

774 Sareen, N., Schwier, A. N., Shapiro, E. L., Mitroo, D., and McNeill, V. F.: Secondary  
775 organic material formed by methylglyoxal in aqueous aerosol mimics, *Atmos. Chem. Phys.*, 10,  
776 997-1016, doi:10.5194/acp-10-997-2010, 2010.

777 Shapiro, E. L., Szprengiel, J., Sareen, N., Jen, C. N., Giordano, M. R., and McNeill, V. F.:  
778 Light-absorbing secondary organic material formed by glyoxal in aqueous aerosol mimics,  
779 *Atmos. Chem. Phys.*, 9, 2289-2300, 2009.

780 Shi, J., Gao, H., Qi, J., Zhang, J., and Yao, X.: Sources, compositions, and distributions of  
781 water-soluble organic nitrogen in aerosols over the China Sea, *J. Geophys. Res.-Atmos.*, 115,  
782 doi:10.1029/2009jd013238, 2010.

---

783 Shrivastava, M., Cappa, C. D., Fan, J. W., Goldstein, A. H., Guenther, A. B., Jimenez, J.  
 784 L., Kuang, C., Laskin, A., Martin, S. T., Ng, N. L., Petaja, T., Pierce, J. R., Rasch, P. J., Roldin,  
 785 P., Seinfeld, J. H., Shilling, J., Smith, J. N., Thornton, J. A., Volkamer, R., Wang, J., Worsnop,  
 786 D. R., Zaveri, R. A., Zelenyuk, A., and Zhang, Q.: Recent advances in understanding secondary  
 787 organic aerosol: Implications for global climate forcing, *Rev. Geophys.*, 55, 509-559,  
 788 doi:10.1002/2016RG000540, 2017.

789 Silva, P. J., and Prather, K. A.: Interpretation of mass spectra from organic compounds in  
 790 aerosol time-of-flight mass spectrometry, *Anal. Chem.*, 72, 3553-3562, 2000.

791 Stefenelli, G., Pospisilova, V., Lopez-Hilfiker, F. D., Daellenbach, K. R., Hüglin, C., Tong,  
 792 Y., Baltensperger, U., Prevot, A. S. H., and Slowik, J. G.: Organic aerosol source apportionment  
 793 in Zurich using extractive electrospray ionization time-of-flight mass spectrometry (EESI-TOF):  
 794 Part I, biogenic influences and day/night chemistry in summer, *Atmos. Chem. Phys. Discuss.*,  
 795 2019, 1-36, doi:10.5194/acp-2019-361, 2019.

796 Sullivan, R. C., and Prather, K. A.: Investigations of the diurnal cycle and mixing state of  
 797 oxalic acid in individual particles in Asian aerosol outflow, *Environ. Sci. Technol.*, 41, 8062-  
 798 8069, 2007.

799 Sun, J. Z., Zhi, G. R., Hittenberger, R., Chen, Y. J., Tian, C. G., Zhang, Y. Y., Feng, Y.,  
 800 L., Cheng, M. M., Zhang, Y. Z., Cai, J., Chen, F., Qiu, Y., Jiang, Z., Li, J., Zhang, G., and Mo,  
 801 Y.: Emission factors and light absorption properties of brown carbon from household coal  
 802 combustion in China, *Atmos. Chem. Phys.*, 17, 4769-4780, doi:10.5194/acp-17-4769-2017,  
 803 2017.

804 Sun, Y. L., Zhang, Q., Schwab, J. J., Demerjian, K. L., Chen, W. N., Bae, M. S., Hung, H.  
 805 M., Hogrefe, O., Frank, B., Rattigan, O. V., and Lin, Y. C.: Characterization of the sources and  
 806 processes of organic and inorganic aerosols in New York city with a high-resolution time-of-  
 807 flight aerosol mass spectrometer, *Atmos. Chem. Phys.*, 11, 1581-1602, doi:10.5194/acp-11-  
 808 1581-2011, 2011.

---

809 Updyke, K. M., Nguyen, T. B., and Nizkorodov, S. A.: Formation of brown carbon via  
810 reactions of ammonia with secondary organic aerosols from biogenic and anthropogenic  
811 precursors, *Atmos. Environ.*, 63, 22-31, doi:10.1016/j.atmosenv.2012.09.012, 2012.

812 Wang, X. F., Gao, S., Yang, X., Chen, H., Chen, J. M., Zhuang, G. S., Surratt, J. D., Chan,  
813 M. N., and Seinfeld, J. H.: Evidence for High Molecular Weight Nitrogen-Containing Organic  
814 Salts in Urban Aerosols, *Environ. Sci. Technol.*, 44, 4441-4446, 2010.

815 Wang, X. F., Wang, H. L., Jing, H., Wang, W. N., Cui, W. D., Williams, B. J., and Biswas,  
816 P.: Formation of Nitrogen-Containing Organic Aerosol during Combustion of High-Sulfur-  
817 Content Coal, *Energ. Fuel.*, 31, 14161-14168, doi:10.1021/acs.energyfuels.7b02273, 2017.

818 Woo, J. L., Kim, D. D., Schwier, A. N., Li, R. Z., and McNeill, V. F.: Aqueous aerosol  
819 SOA formation: impact on aerosol physical properties, *Faraday Discuss.*, 165, 357-367,  
820 doi:10.1039/c3fd00032j, 2013.

821 Xu, W. Q., Sun, Y. L., Wang, Q. Q., Du, W., Zhao, J., Ge, X. L., Han, T. T., Zhang, Y. J.,  
822 Zhou, W., Li, J., Fu, P. Q., Wang, Z. F., and Worsnop, D. R.: Seasonal Characterization of  
823 Organic Nitrogen in Atmospheric Aerosols Using High Resolution Aerosol Mass Spectrometry  
824 in Beijing, China, *Acs Earth Space Chem.*, 1, 673-682,  
825 doi:10.1021/acsearthspacechem.7b00106, 2017.

826 Yan, J., Wang, X., Gong, P., Wang, C., and Cong, Z.: Review of brown carbon aerosols:  
827 Recent progress and perspectives, *Sci. Total. Environ.*, 634, 1475-1485,  
828 doi:10.1016/j.scitotenv.2018.04.083, 2018.

829 Yu, X., Yu, Q. Q., Zhu, M., Tang, M. J., Li, S., Yang, W. Q., Zhang, Y. L., Deng, W., Li,  
830 G. H., Yu, Y. G., Huang, Z. H., Song, W., Ding, X., Hu, Q. H., Li, J., Bi, X. H., and Wang, X.  
831 M.: Water Soluble Organic Nitrogen (WSO<sub>N</sub>) in Ambient Fine Particles Over a Megacity in  
832 South China: Spatiotemporal Variations and Source Apportionment, *J. Geophys. Res.-Atmos.*,  
833 122, 13045-13060, doi:10.1002/2017JD027327, 2017.

834 Yuan, B., Liggitto, J., Wentzell, J., Li, S. M., Stark, H., Roberts, J. M., Gilman, J., Lerner,  
835 B., Warneke, C., Li, R., Leithead, A., Osthoff, H. D., Wild, R., Brown, S. S., and de Gouw, J.  
836 A.: Secondary formation of nitrated phenols: insights from observations during the Uintah

---

837 BasinWinter Ozone Study (UBWOS) 2014, *Atmos. Chem. Phys.*, 16, 2139-2153,  
 838 doi:10.5194/acp-16-2139-2016, 2016.

839 Yuan, Q., Lai, S., Song, J., Ding, X., Zheng, L., Wang, X., Zhao, Y., Zheng, J., Yue, D.,  
 840 Zhong, L., Niu, X., and Zhang, Y.: Seasonal cycles of secondary organic aerosol tracers in rural  
 841 Guangzhou, Southern China: The importance of atmospheric oxidants, *Environ. Pollut.*, 240,  
 842 884-893, doi:10.1016/j.envpol.2018.05.009, 2018.

843 Zauscher, M. D., Wang, Y., Moore, M. J. K., Gaston, C. J., and Prather, K. A.: Air Quality  
 844 Impact and Physicochemical Aging of Biomass Burning Aerosols during the 2007 San Diego  
 845 Wildfires, *Environ. Sci. Technol.*, 47, 7633-7643, doi:10.1021/es4004137, 2013.

846 Zawadowicz, M. A., Froyd, K. D., Murphy, D. M., and Cziczo, D. J.: Improved  
 847 identification of primary biological aerosol particles using single-particle mass spectrometry,  
 848 *Atmos. Chem. Phys.*, 17, 7193-7212, doi:10.5194/acp-17-7193-2017, 2017.

849 Zhang, G., Lin, Q., Peng, L., Yang, Y., Jiang, F., Liu, F., Song, W., Chen, D., Cai, Z., Bi,  
 850 X., Miller, M., Tang, M., Huang, W., Wang, X., Peng, P., and Sheng, G.: Oxalate Formation  
 851 Enhanced by Fe-Containing Particles and Environmental Implications, *Environ. Sci. Technol.*,  
 852 53, 1269-1277, doi:10.1021/acs.est.8b05280, 2019.

853 Zhang, G. H., Bi, X. H., He, J. J., Chen, D. H., Chan, L. Y., Xie, G. W., Wang, X. M.,  
 854 Sheng, G. Y., Fu, J. M., and Zhou, Z.: Variation of secondary coatings associated with  
 855 elemental carbon by single particle analysis, *Atmos. Environ.*, 92, 162-170,  
 856 doi:10.1016/j.atmosenv.2014.04.018, 2014.

857 Zhang, G. H., Lin, Q. H., Peng, L., Yang, Y. X., Fu, Y. Z., Bi, X. H., Li, M., Chen, D. H.,  
 858 Chen, J. X., Cai, Z., Wang, X. M., Peng, P. A., Sheng, G. Y., and Zhou, Z.: Insight into the in-  
 859 cloud formation of oxalate based on in situ measurement by single particle mass spectrometry,  
 860 *Atmos. Chem. Phys.*, 17, 13891-13901, doi:10.5194/acp-17-13891-2017, 2017.

861 Zhang, Q., Duan, F., He, K., Ma, Y., Li, H., Kimoto, T., and Zheng, A.: Organic nitrogen  
 862 in PM<sub>2.5</sub> in Beijing, *Frontiers of Environmental Science & Engineering*, 9, 1004-1014,  
 863 doi:10.1007/s11783-015-0799-5, 2015.

---

864        Zhang, Y. S., Shao, M., Lin, Y., Luan, S. J., Mao, N., Chen, W. T., and Wang, M.:  
865        Emission inventory of carbonaceous pollutants from biomass burning in the Pearl River Delta  
866        Region, China, *Atmos. Environ.*, 76, 189-199, doi:10.1016/j.atmosenv.2012.05.055, 2013.

867        Zhao, R., Lee, A. K. Y., and Abbatt, J. P. D.: Investigation of Aqueous-Phase  
868        Photooxidation of Glyoxal and Methylglyoxal by Aerosol Chemical Ionization Mass  
869        Spectrometry: Observation of Hydroxyhydroperoxide Formation, *J. Phys. Chem. A*, 116, 6253-  
870        6263, doi:10.1021/jp211528d, 2012.

871        Zhao, R., Lee, A. K. Y., Huang, L., Li, X., Yang, F., and Abbatt, J. P. D.: Photochemical  
872        processing of aqueous atmospheric brown carbon, *Atmos. Chem. Phys.*, 15, 6087-6100,  
873        doi:10.5194/acp-15-6087-2015, 2015.

874        Zheng, J. Y., Yin, S. S., Kang, D. W., Che, W. W., and Zhong, L. J.: Development and  
875        uncertainty analysis of a high-resolution NH<sub>3</sub> emissions inventory and its implications with  
876        precipitation over the Pearl River Delta region, China, *Atmos. Chem. Phys.*, 12, 7041-7058,  
877        doi:10.5194/acp-12-7041-2012, 2012.

878        Zhou, S. Z., Wang, T., Wang, Z., Li, W. J., Xu, Z., Wang, X. F., Yuan, C., Poon, C. N.,  
879        Louie, P. K. K., Luk, C. W. Y., and Wang, W. X.: Photochemical evolution of organic aerosols  
880        observed in urban plumes from Hong Kong and the Pearl River Delta of China, *Atmos. Environ.*,  
881        88, 219-229, doi:10.1016/j.atmosenv.2014.01.032, 2014.

882        Zhou, Y., Huang, X. H. H., Griffith, S. M., Li, M., Li, L., Zhou, Z., Wu, C., Meng, J. W.,  
883        Chan, C. K., Louie, P. K. K., and Yu, J. Z.: A field measurement based scaling approach for  
884        quantification of major ions, organic carbon, and elemental carbon using a single particle  
885        aerosol mass spectrometer, *Atmos. Environ.*, 143, 300-312,  
886        doi:10.1016/j.atmosenv.2016.08.054, 2016.

887        Zhu, S. P., Horne, J. R., Montoya-Aguilera, J., Hinks, M. L., Nizkorodov, S. A., and  
888        Dabdub, D.: Modeling reactive ammonia uptake by secondary organic aerosol in CMAQ:  
889        application to the continental US, *Atmos. Chem. Phys.*, 18, 3641-3657, doi:10.5194/acp-18-  
890        3641-2018, 2018.

891

## Figure captions

Figure 1. Representative mass spectrum for NOCs-containing particles. The ion peaks corresponding to NOCs and oxidized organics are highlighted with red bars.

Figure 2. The variation in hourly mean Nfs of the oxidized organics and ammonium that internally mixed with NOCs. Box and whisker plot shows lower, median and upper lines, denoting the 25<sup>th</sup>, 50<sup>th</sup> and 75<sup>th</sup> percentiles, respectively; the lower and upper edges denote the 10<sup>th</sup> and 90<sup>th</sup> percentiles, respectively.

Figure 3. Correlation analysis of (a, c) the RPAs and (b, d) the number of detected NOCs, with the oxidized organics and ammonium in different seasons. Significant ( $p < 0.01$ ) correlations were obtained for both the total observed data and the seasonally separated data. RPA is defined as the fractional peak area of each  $m/z$  relative to the sum of peak areas in the mass spectrum and is applied to represent the relative amount of a species on a particle (Jeong et al., 2011; Healy et al., 2013).

Figure 4. Comparison between the measured and predicted RPAs for NOCs.

Figure 5. (left) PMF-resolved 3-factor source profiles (percentage of total species) and (right) their diurnal variation (arbitrary unit).

Figure 6. The dependence of NOCs and the ratio of NOCs to the oxidized organics on RH.



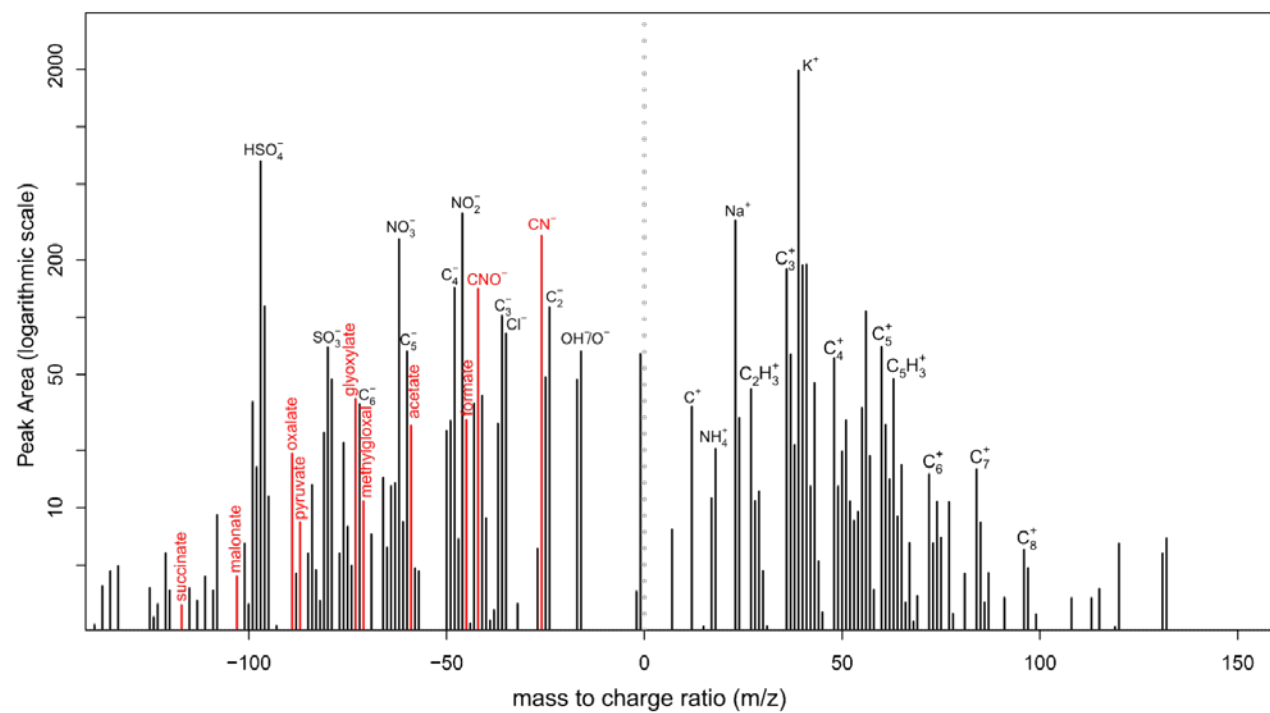

910

911

Fig. 1.

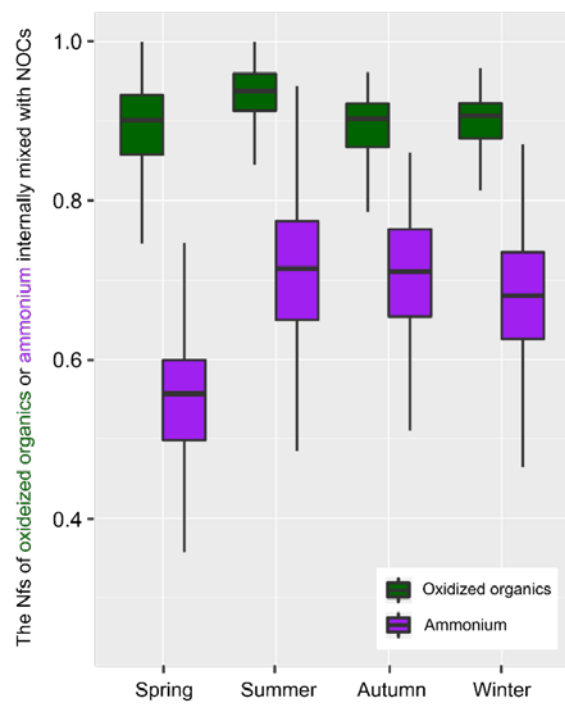

Fig. 2.

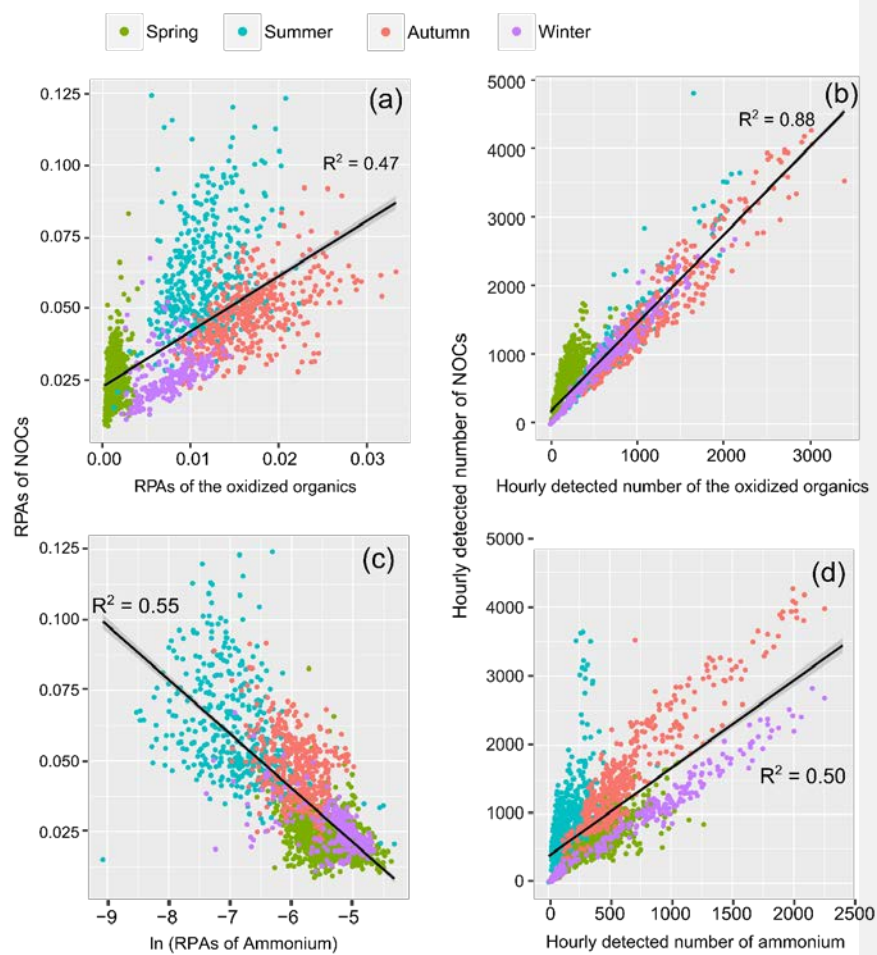

Fig. 3.

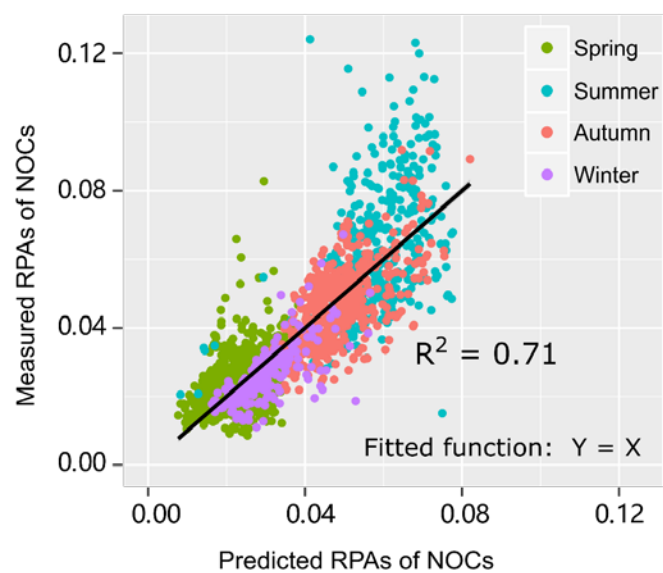

**Fig. 4.**

918

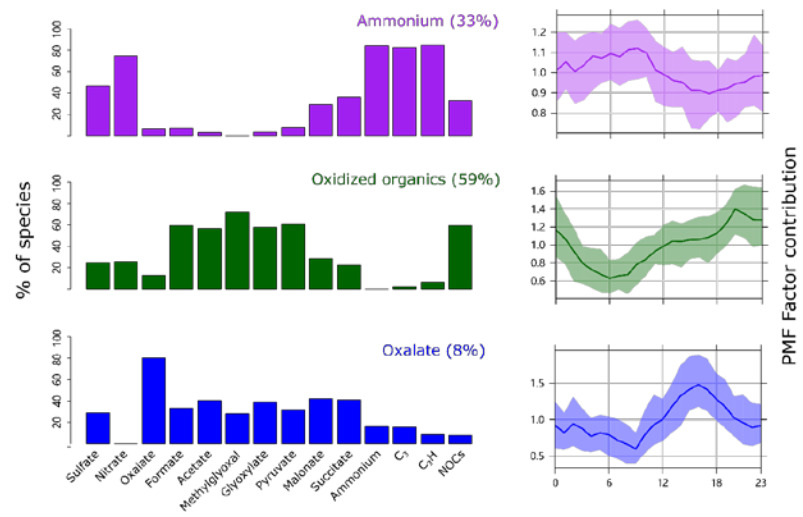

919

920

Fig. 5.

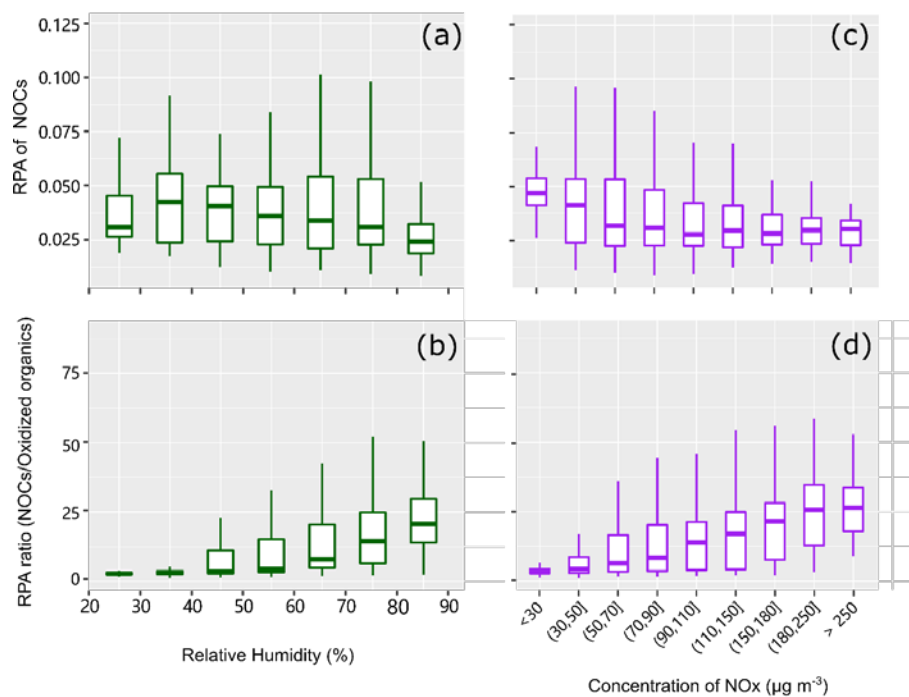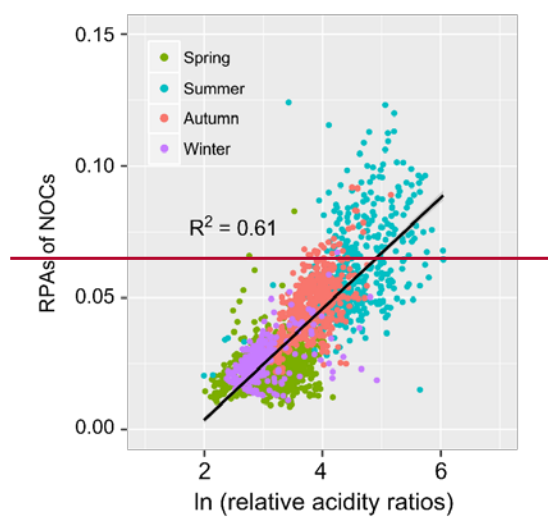

Fig. 6.

Fig. 7.

Supporting Information for

**High secondary formation of nitrogen-containing organics (NOCs) and its possible link to oxidized organics and ammonium**

Guohua Zhang<sup>1</sup>, Xiufeng Lian<sup>1,2</sup>, Yuzhen Fu<sup>1,2</sup>, Qinhao Lin<sup>1</sup>, Lei Li<sup>3</sup>, Wei Song<sup>1</sup>, Zhanyong Wang<sup>4</sup>, Mingjin Tang<sup>1</sup>, Duohong Chen<sup>5</sup>, Xinhui Bi<sup>1,\*</sup>, Xinming Wang<sup>1</sup>, Guoying Sheng<sup>1</sup>

<sup>1</sup> State Key Laboratory of Organic Geochemistry and Guangdong Key Laboratory of Environmental Resources Utilization and Protection, Guangzhou Institute of Geochemistry, Chinese Academy of Sciences, Guangzhou 510640, PR China

<sup>2</sup> University of Chinese Academy of Sciences, Beijing 100039, PR China

<sup>3</sup> Institute of Mass Spectrometer and Atmospheric Environment, Jinan University, Guangzhou 510632, China

<sup>4</sup> School of Intelligent Systems Engineering, Sun Yat-sen University, Shenzhen 518107, PR China

<sup>5</sup> State Environmental Protection Key Laboratory of Regional Air Quality Monitoring, Guangdong Environmental Monitoring Center, Guangzhou 510308, PR China

## Instrumentation

Individual particles are introduced into SPAMS through a critical orifice. They are focused and accelerated to specific velocities, which are determined by two continuous diode Nd:YAG laser beams (532 nm). Based on the measured velocities, a pulsed laser (266 nm) downstream is triggered to desorb/ionize the particles. The produced positive and negative molecular fragments are recorded. In summary, a velocity, a detection moment, and an ion mass spectrum are recorded for each ionized particle, while there is no mass spectrum for not ionized particles. The velocity could be converted to  $d_{va}$  based on a calibration using polystyrene latex spheres (PSL, Duke Scientific Corp., Palo Alto) with predefined sizes. It is noted that pure ammonium sulfate is difficult to be ionized under 266 nm UV laser used in the SPAMS, although this may not be the case since we focused on the NOCs-containing particles.

The concentrations of  $\text{NO}_x$ , and  $\text{O}_3$  were measured by Model 42i ( $\text{NO-NO}_2\text{-NO}_x$ ) Analyzer, and Model 49i  $\text{O}_3$  Analyzer (Thermo Fisher Scientific Inc.), respectively. The concentrations of  $\text{PM}_{2.5}$  were continuously measured using a tapered element oscillating microbalance (TEOM 1405, Thermo Fisher Scientific Inc.), respectively.

## Positive matrix factorization

PMF is a multivariate receptor model used to determine source factors, and it has been used extensively with temporal variation data. In order to complement single particle data analysis, we used USEPA PMF 5.0 (Norris et al., 2009) to group chemical markers from all the detected particles. In such analysis, RPAs for ion markers were



typically used as input in the PMF model. An uncertainty of 50% in RPA was used due to the shot-to-shot fluctuations of desorption laser and complex particle matrix (Zauscher et al., 2013). 14 marker ions were used, including sulfate ( $-97[\text{HSO}_4]^-$ ), nitrate ( $-62[\text{NO}_3]^-$ ), ammonium ( $18[\text{NH}_4]^+$ ), oxalate ( $89[\text{HC}_2\text{O}_4]^-$ ), oxidized organics markers (at  $m/z$  -45 $[\text{HCO}_2]^-$ ,  $m/z$  -59 $[\text{CH}_3\text{CO}_2]^-$ ,  $m/z$  -71 $[\text{C}_3\text{H}_3\text{O}_2]^-$ ,  $m/z$  -73 $[\text{C}_2\text{HO}_3]^-$ ,  $m/z$  -87 $[\text{C}_3\text{H}_3\text{O}_3]^-$ ,  $m/z$  -103 $[\text{C}_3\text{H}_3\text{O}_4]^-$ , and  $m/z$  -117 $[\text{C}_4\text{H}_5\text{O}_4]^-$ ), organic nitrogen markers (NOCs, sum of  $-42[\text{CNO}]^-$  and  $-26[\text{CN}]^-$ ), and other carbonaceous fragments (i.e.,  $36[\text{C}_3]^+$ ,  $37[\text{C}_3\text{H}]^+$ ).

PMF solutions with 2–5 factors were tested and showed convergence results. The relevant  $Q$  values and  $Q_{\text{robust}} / Q_{\text{theory}}$  for these solutions are shown in Table S3. In these solutions explored  $Q_{\text{robust}} / Q_{\text{theory}} < 1$ , although it is recommended that  $Q_{\text{robust}} \approx Q_{\text{theory}}$ . The 3-factor solution was chosen as the best because the measured versus predicted RPA of more relevant chemical species (i.e., NOCs, the oxidized organics and ammonium) in the PMF model had strong correlations ( $R^2 = 0.56\text{--}0.95$ ), and also has the most physically meaningful factors. The residuals of this solution were between -2 and 2. In the 4 and 5-factor solution, with slightly stronger  $R^2$  values than the 3-factor solution for NOCs and ammonium, but had two similar oxalate factors or an additional methylglyoxal factor, respectively, which seemed less physically meaningful. Bootstrapping on the 3-factor solution shows stable results, with > 90 out of 100 bootstrap factors mapped with those in the based run.  $F_{\text{peak}}$  value from -0.5 to 0.5 was examined, and an examination of  $Q$  values showed the application of  $F_{\text{peak}}$  of 0 giving the best result.

## **Limited dependent of NOCs on the oxidized organics during spring and ammonium during summer**

During summer, the hourly detected number of NOCs showed a limited dependent on ammonium (Fig. 3d). As shown in Fig. S4, the detected number of ammonium is obviously lower than NOCs. In contrast, there were prevalent oxidized organics that were associated with NOCs. Due to the volatility of ammonium nitrate, there is less particulate ammonium in summer. Higher level of  $\text{NH}_3$  during summer (Pan et al., 2018) may have potential influence on the formation of NOCs. Less dependence of NOCs on ammonium could be due to the more predominant formation of secondary NOCs through the uptake of  $\text{NH}_3$  and the following interactions with secondary oxidized organics. As shown by Nguyen et al. (2012), ammonia is more efficient for the formation of NOCs in this pathway than ammonium. As also supported with PMF results shown in Fig. 5, the oxidized organics factor dominant contributed to the predicted NOCs during warmer seasons. Limited ammonium in this factor may also indicate that abundance of oxidized organics during warmer season consumed the available ammonium. As discussed, such chemistry would even lead to a reduction in the concentrations of  $\text{NH}_3$  and  $\text{NH}_4^+$  through a model simulation (Zhu et al., 2018). However, NOCs showed a limited dependent on the oxidized organics during spring (Fig. 3a and 3b). Consistently, the lowest fraction of NOCs that contained the oxidized organics was observed (Fig. S4), and ammonium factor explained ~80% of the predicted NOCs (Fig. 5) during spring. It is likely attributed to the higher conversion of oxidized organics to the observed NOCs in humid air during spring (Fig. 6 and Table S1). In addition, possible reasons might also include more primary NOCs and unidentified oxidized organics.

85 Table S1. The number and Nfs of NOCs-containing particles in the all the detected  
86 particles during four seasons, respectively. Standard errors for the Nfs of particles were  
87 estimated assuming Poisson distribution(Pratt et al., 2010). Temperature (T), relative  
88 humidity (RH), O<sub>3</sub>, and PM<sub>2.5</sub> were provided by Guangdong Environmental Monitoring  
89 Center. The arriving air masses in Guangzhou, have been described previously: prevalence  
90 of marine air masses in spring and summer, whereas northern air masses from inland China  
91 in autumn and winter.

92

|                                         | Spring       | Summer       | Autumn       | Winter       |
|-----------------------------------------|--------------|--------------|--------------|--------------|
| Num. of all the detected particles      | 933934       | 719371       | 1202604      | 397637       |
| Nfs of NOCs-containing particles        | 58.7 ± 0.08% | 59.4 ± 0.09% | 59.0 ± 0.07% | 55.6 ± 0.1%  |
| Temperature (°C)                        | 18.8 ± 4.2   | 29.0 ± 2.7   | 24.9 ± 2.6   | 11.3 ± 2.3   |
| Relative Humidity (%)                   | 68.0 ± 13.4  | 66.0 ± 11.4  | 47.0 ± 10.1  | 43.0 ± 19.1  |
| O <sub>x</sub> (μg m <sup>-3</sup> )    | 100.4 ± 43.7 | 114.5 ± 70.6 | 136.3 ± 35.4 | 113.1 ± 34.0 |
| PM <sub>2.5</sub> (μg m <sup>-3</sup> ) | 51.2 ± 26.0  | 31.9 ± 21.0  | 44.3 ± 18.1  | 55.3 ± 28.9  |

93

94 Table S2. Coefficients calculated with a multiple linear regression analysis of the  
 95 RPAs of NOCs and those of the oxidized organics and ammonium. All the regressions  
 96 show significant correlation, with the fitting coefficients shown with a standard error.  
 97

|             | The oxidized organics | Ln (Ammonium)     | R <sup>2</sup> |
|-------------|-----------------------|-------------------|----------------|
| Spring      | 4.24 ± 0.36           | -0.0064 ± 0.00057 | 0.24           |
| Summer      | 1.69 ± 0.22           | -0.012 ± 0.0013   | 0.24           |
| Autumn      | 1.27 ± 0.09           | -0.0086 ± 0.0011  | 0.38           |
| Winter      | 1.57 ± 0.14           | -0.0010 ± 0.00069 | 0.57           |
| Autumn 2014 | 1.18 ± 0.11           | -0.013 ± 0.0042   | 0.35           |

98

99 Table S3. Q values for PMF Analysis with different number of factors.

100

| Num.<br>of factors | R <sup>2</sup> # for all the<br>input species | R <sup>2</sup> for NOCs | R <sup>2</sup> for the<br>oxidized organics | R <sup>2</sup> for ammonium | Q <sub>robust</sub> * | Q <sub>robust</sub> /Q <sub>theory</sub> |
|--------------------|-----------------------------------------------|-------------------------|---------------------------------------------|-----------------------------|-----------------------|------------------------------------------|
| 2                  | 0.28-0.95                                     | 0.28                    | 0.44-0.95                                   | 0.46                        | 12110                 | 0.76                                     |
| 3                  | 0.25-0.95                                     | 0.74                    | 0.59-0.95                                   | 0.56                        | 8278                  | 0.59                                     |
| 4                  | 0.49-0.92                                     | 0.78                    | 0.59-0.92                                   | 0.64                        | 6485                  | 0.53                                     |
| 5                  | 0.41-0.94                                     | 0.83                    | 0.58-0.94                                   | 0.66                        | 4944                  | 0.47                                     |

101

102 # R<sup>2</sup> between the observed and predicted species

103 \* Q<sub>robust</sub> with F<sub>peak</sub> = 0.

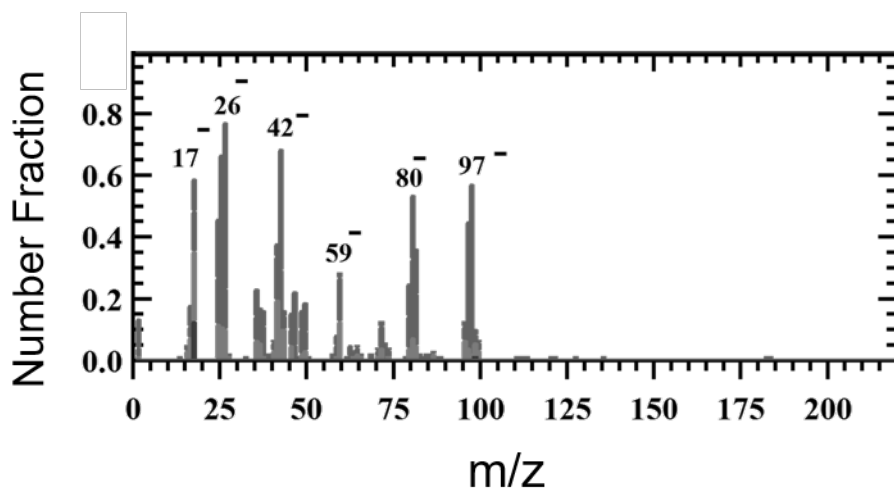

104

105

106 **Figure S1.** The number fraction of ion peaks versus  $m/z$  from the bulk solution-phase  
 107 reaction of ammonium sulfate and methylglyoxal. The bulk solution-phase reaction was  
 108 prepared with 1M ammonium sulfate and 1M methylglyoxal solution, and aged in sealed  
 109 bottles under dark conditions and at room temperature for several days. BrC SOA formed  
 110 from such reaction has been previously reported to be significantly contributed from  
 111 NOCs (Aiona et al., 2017).

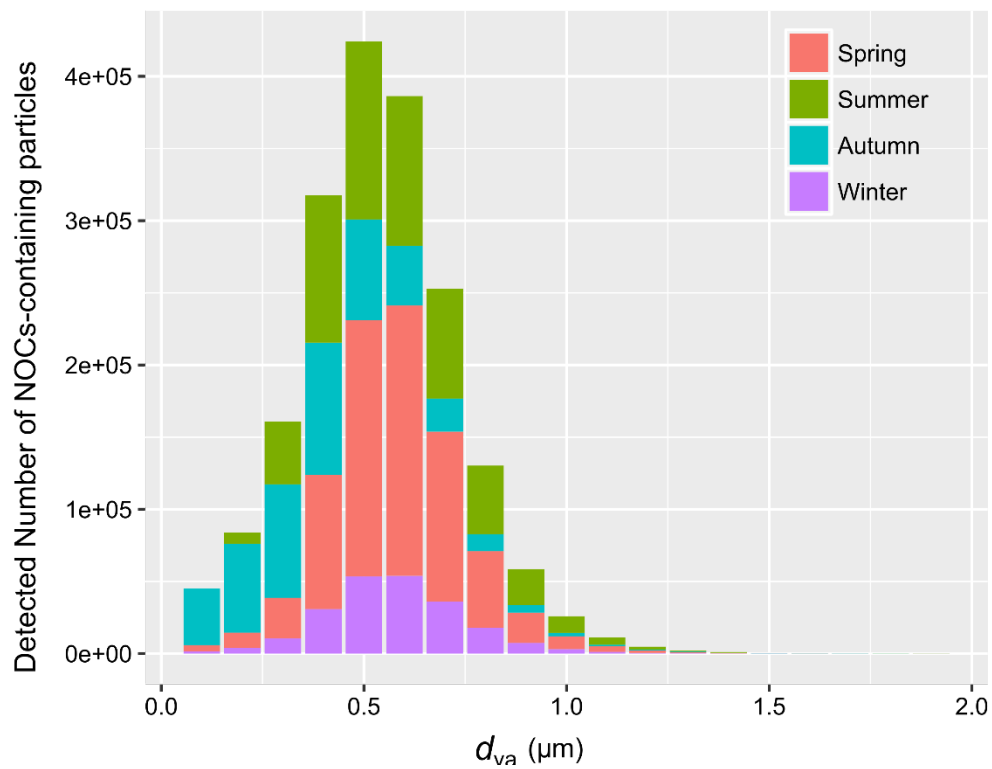

**Figure S2.** The detected number of NOC-containing particles along  $d_{va}$ .

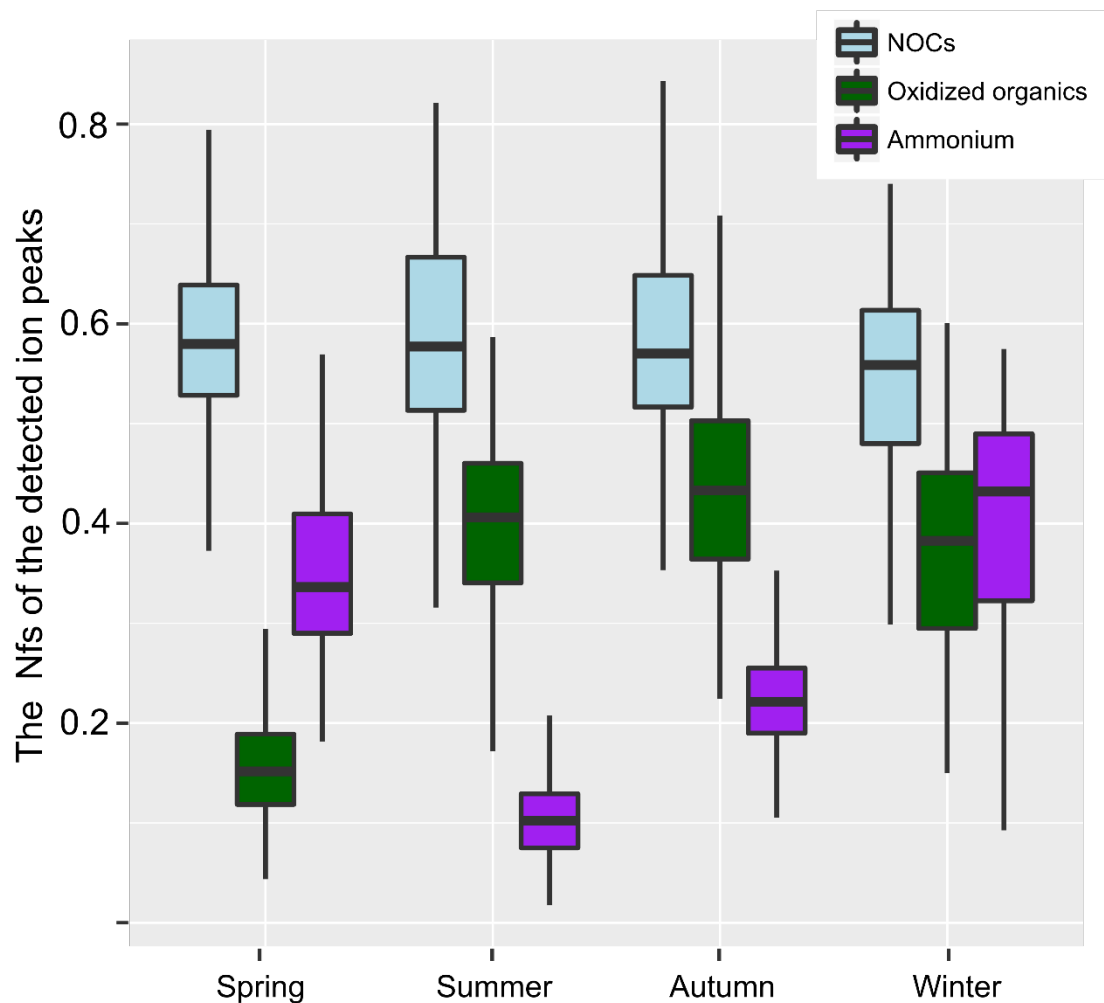

115  
116

117 **Figure S3.** The distribution of the Nfs of the detected ion peaks over four seasons.



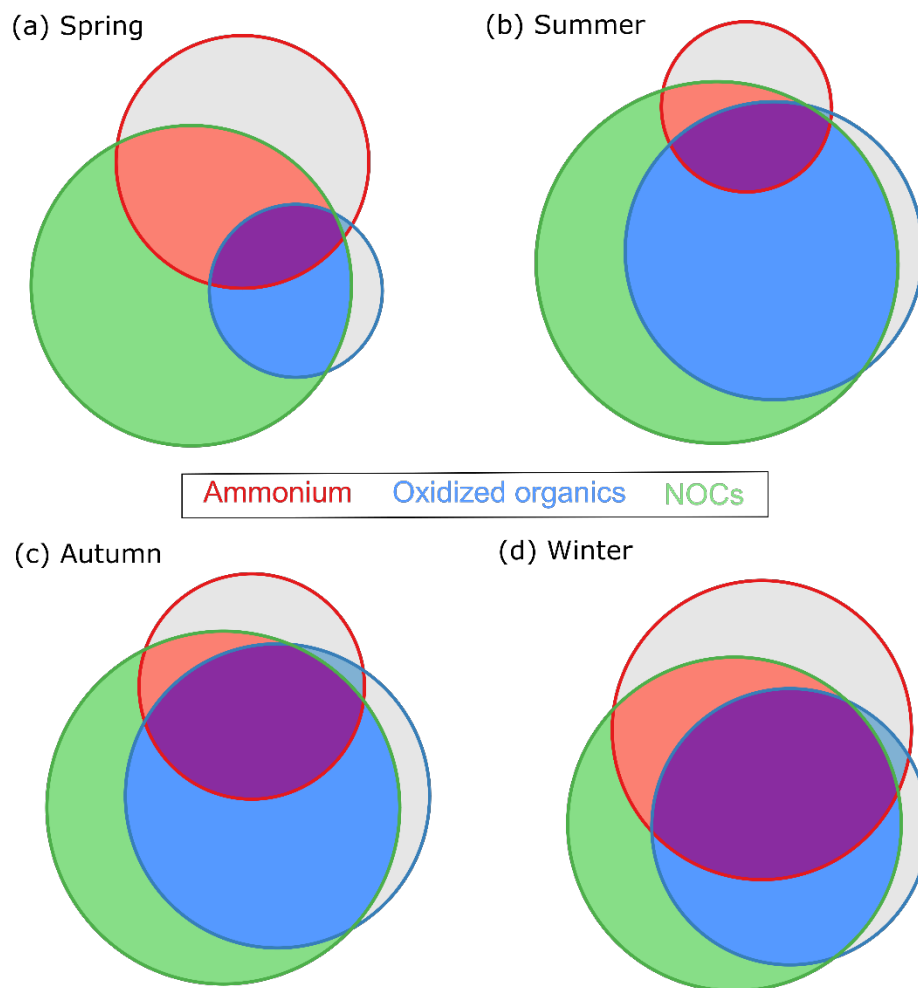

118  
119

120 Figure S4. Venn plot of number based mixing state involving NOCs (green circle), the  
121 oxidized organics (blue circle), and ammonium (red circle).

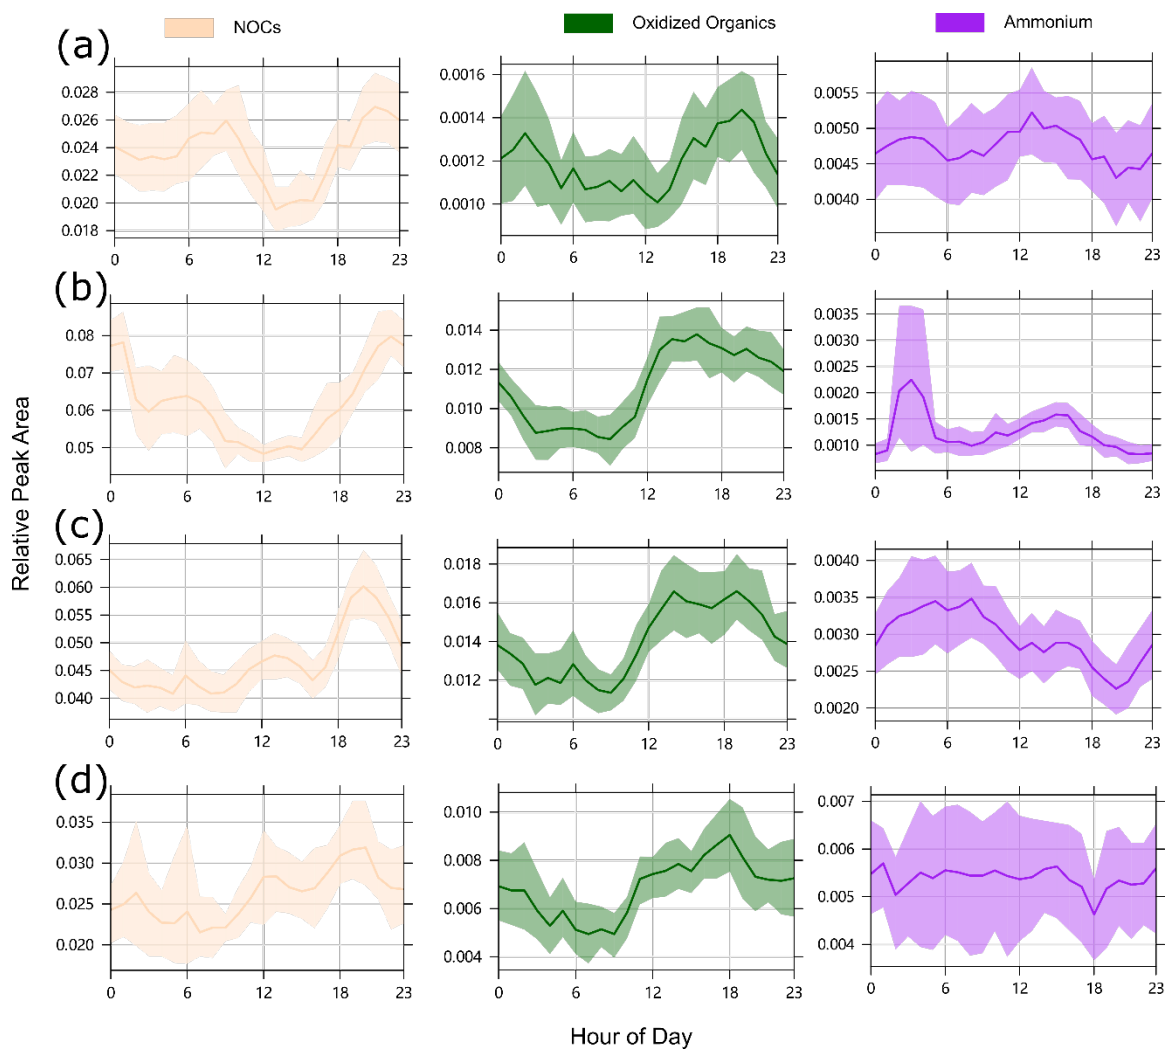

122

123

124 Figure S5. Diurnal variations of RPAs of NOCs, oxidized organics, and ammonium from  
 125 spring to winter (a-d).

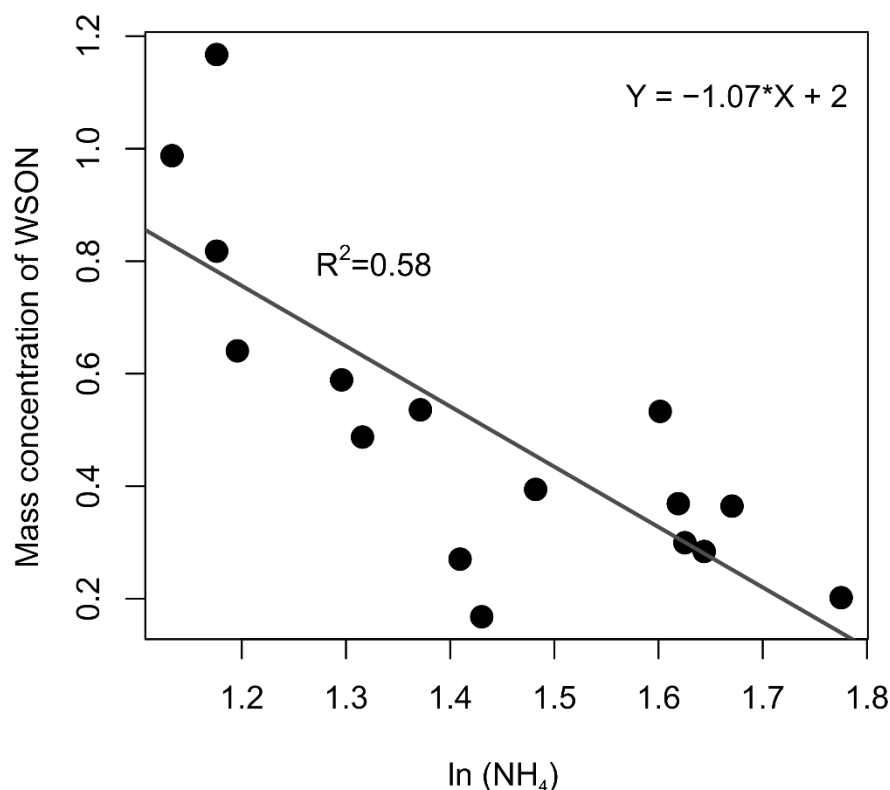

126  
127

128 Figure S6. Relationship between the mass concentration of WSON and ammonium  
129 (logarithmic transformed) in submicron particles during autumn of 2014. It is noted that  
130 WSON (represented as the mass concentration of organic N) might not be properly  
131 regarded as NOCs, as no significant correlation between daily mean mass  
132 concentrations/fraction of WSON and the RPAs of NOCs. This is probably because the  
133 daily mean values calculated for the RPAs of NOCs miss the temporal variation  
134 information. Also, a part of NOCs might not be water-soluble (Cape et al., 2011).

135 During the autumn of 2014, daily size-resolved quartz fiber filter samples were  
136 collected using an Andersen PM<sub>10</sub> sampler equipped with a size-selective inlet high  
137 volume cascade impactor (Model SA235, Andersen Instruments Inc.). The filters were  
138 baked for 4 h in a muffle furnace at 500 °C before use. Water-soluble inorganic ions were

139 analyzed by ion chromatography (Metrohm 883, Switzerland). In addition, water soluble  
140 organic carbon (WSOC) and nitrogen (WSON) were analyzed by a Total Organic Carbon  
141 Analysis Instrument (TOC, Germany). It is noted that NOCs, the oxidized organics, and  
142 ammonium during this period also showed a similar relationship with that during autumn  
143 of 2013.

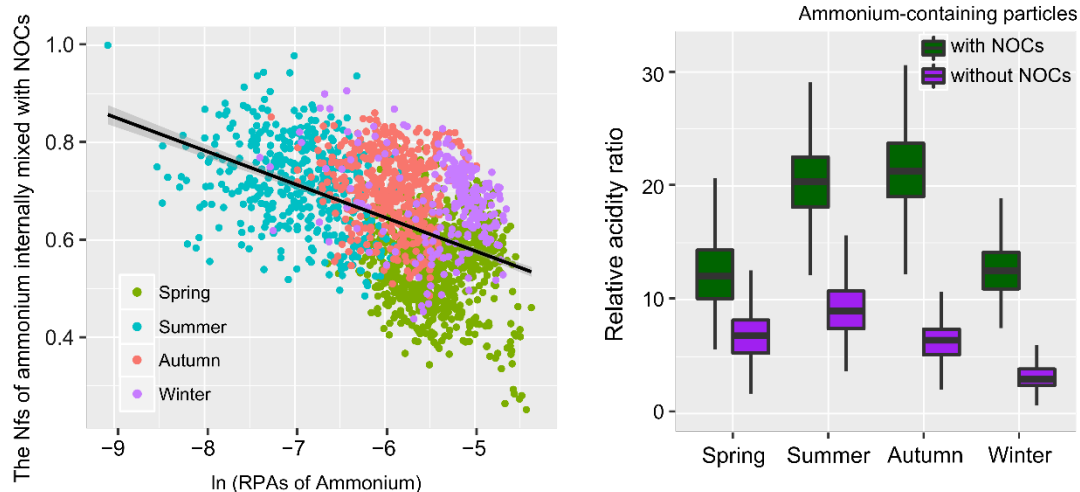

144  
145

146 Figure S7. Relationship between the Nfs of ammonium that was internally mixed with  
147 NOCs and RPAs of ammonium (left), and comparison of the relative acidity ratio  
148 between ammonium-containing particles internally and externally mixed with NOCs  
149 (right).

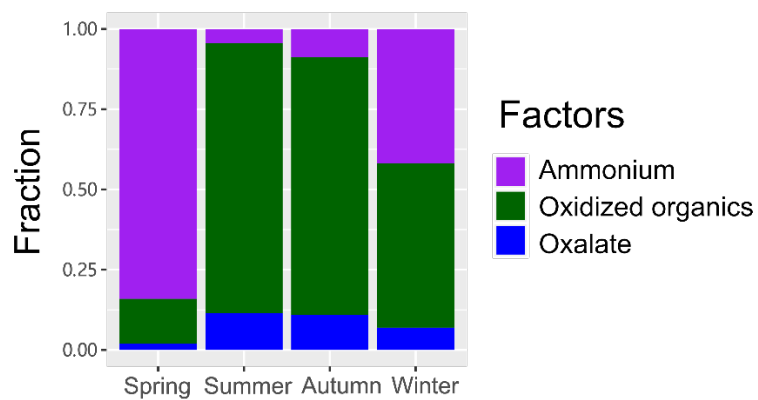

150  
151

152 Figure S8. The relative contributions of the PMF-resolved 3-factor to the modelled NOCs  
153 over the seasons.

154 References

- 155 Aiona, P. K., Lee, H. J., Leslie, R., Lin, P., Laskin, A., Laskin, J., and Nizkorodov, S. A.:  
156 Photochemistry of Products of the Aqueous Reaction of Methylglyoxal with Ammonium  
157 Sulfate, *Acs Earth Space Chem.*, 1, 522-532, doi:10.1021/acsearthspacechem.7b00075,  
158 2017.
- 159 Cape, J. N., Cornell, S. E., Jickells, T. D., and Nemitz, E.: Organic nitrogen in the atmosphere —  
160 Where does it come from? A review of sources and methods, *Atmos. Res.*, 102, 30-48,  
161 doi:10.1016/j.atmosres.2011.07.009, 2011.
- 162 Norris, G., Vedantham, R., Wade, K., Zahn, P., Brown, S., Paatero, P., Eberly, S., and Foley, C.  
163 (2009), Guidance document for PMF applications with the Multilinear Engine, edited,  
164 Prepared for the U.S. Environmental Protection Agency, Research Triangle Park, NC.
- 165 Pratt, K. A., Heymsfield, A. J., Twohy, C. H., Murphy, S. M., DeMott, P. J., Hudson, J. G.,  
166 Subramanian, R., Wang, Z. E., Seinfeld, J. H., and Prather, K. A.: In Situ Chemical  
167 Characterization of Aged Biomass-Burning Aerosols Impacting Cold Wave Clouds, *J.*  
168 *Atmos. Sci.*, 67, 2451-2468, doi:10.1175/2010JAS3330.1, 2010.
- 169 Zauscher, M. D., Wang, Y., Moore, M. J. K., Gaston, C. J., and Prather, K. A.: Air Quality Impact  
170 and Physicochemical Aging of Biomass Burning Aerosols during the 2007 San Diego  
171 Wildfires, *Environ. Sci. Technol.*, 47, 7633-7643, doi:10.1021/es4004137, 2013.
- 172 Zhu, S. P., Horne, J. R., Montoya-Aguilera, J., Hinks, M. L., Nizkorodov, S. A., and Dabdub, D.:  
173 Modeling reactive ammonia uptake by secondary organic aerosol in CMAQ: application to  
174 the continental US, *Atmos. Chem. Phys.*, 18, 3641-3657, doi:10.5194/acp-18-3641-2018,  
175 2018.
